# Supplementary material
Source: PubMed Central journal article supplement (PMC4115565)
Supplement: 1402663111_pnas.1402663111.sapp.pdf [file 1402663111_pnas.1402663111.sapp.pdf]

## SI Appendix

### Materials and Methods

**Clinical study.** All participants provided written consent prior to any procedures being performed. Male subjects ( $n = 15$ ) aged between 18 and 35 years ( $24 \pm 5$  years; mean  $\pm$  SD) with a BMI of  $24.9 \pm 2.6 \text{ kg/m}^2$  were enrolled into the study, and plasma samples from 12 subjects were analysed ( $23 \pm 5$  years, BMI  $24.5 \pm 2.3 \text{ kg/m}^2$ ).

Screening assessments and the in-laboratory session were conducted at the Surrey Clinical Research Centre. A complete description of the screening process and the study protocol is given in Ackermann et al., 2012 (1). Briefly, to determine eligibility potential participants were required to undergo a medical screening assessment and complete a range of questionnaires including Horne-Östberg Questionnaire (MEQ), Pittsburgh Sleep Quality Index (PSQI), Epworth Sleepiness scale (ESS) and Beck Depression Index (BDI). Exclusion criteria included the taking of any regular medication, pre-existing medical conditions, smoking, any self-reported sleep problems or depression, extreme morning and evening types (as determined by MEQ), PSQI score  $> 5$  and ESS score  $> 9$ .

Subsequently, subjects maintained a regular sleep/wake schedule (23:00 – 07:00 h) for one week prior to the in-laboratory session which was confirmed by wrist actigraphy (Actiwatch-L, Cambridge Neurotechnology Ltd., UK), sleep diaries and subjects calling a time-stamped voicemail upon waking and before going to sleep. For 72 hours before the in-laboratory session, subjects were requested to abstain from alcohol, caffeine, heavy exercise, non-steroidal anti-inflammatory drugs and bright light in the evenings and at night. This baseline-at-home period minimised exogenous confounding factors, stabilised circadian phase and ensured participants were not sleep deprived.

**In-laboratory session.** Subjects remained in controlled conditions with respect to environmental light, sleep, meals and posture throughout the in-laboratory session: 18:00 - 23:00 h and 07:00 – 09:00 h: semi-recumbent,  $< 5$  lux; 23:00 - 07:00 h: recumbent (sleep opportunity), 0 lux on N1, semi-recumbent (continual wakefulness) in  $< 5$  lux on N2; 09:00 - 18:00 h: freely moving, 100 lux (Fig. S5). Standardised meals were given at 07:00, 13:00, and 19:00 h with a snack at 22:00 h; water was available *ad libitum*. The target was 2500 calories per day, which was divided into 3 x 30% (meals) and 1 x 10% (snack). The macronutrient composition of the daily food intake was designed to reflect the UK dietary guidelines (fat 35%, carbohydrate 50%, protein 15% of energy), calculated daily values were fat 35%, carbohydrate 49% and protein 12%. The breakfast, lunch, dinner and snack were identical in composition on all days of

the study with some variation across the meals reflecting the different meal types (breakfast fat 35%, carbohydrate 54%, protein 9%; lunch fat 47%, carbohydrate 38%, protein 13%; dinner fat 35%, carbohydrate 43%, protein 16%; snack fat 25%, carbohydrate 64%, protein 7%; the remaining % energy contribution coming from dietary fibre,  $\leq 3\%$ ). During the sleep period on N1 (23:00 – 07:00 h), samples were taken through a portal in the wall of the individual sleep rooms so that sleep disturbance was minimised. Sleep was monitored by polysomnography on N1 and N2 from 22:00 – 09:00 h. The N1 data were analysed to assess the timing and duration of the different sleep states and the N2 data were used to ensure that subjects remained awake throughout the night of sleep deprivation.

Across the 48 h study period, blood samples for metabolomics analysis (2-hourly) and those for melatonin measurement (hourly) were collected into lithium heparin tubes and separated by centrifugation. Plasma fractions for metabolomics analysis were stored at  $-80^{\circ}\text{C}$  until extraction; plasma for melatonin measurement was stored at  $-20^{\circ}\text{C}$  until analysis.

**Melatonin measurement.** To determine concentrations of melatonin, radioimmunoassay analysis was performed on hourly plasma samples (Stockgrand Ltd., University of Surrey) as previously described (2). The limit of detection for the plasma melatonin assay was  $2.6 \pm 1.3$  pg/ml (mean  $\pm$  SEM). The interassay coefficients of variation (CVs) were 12% at 7.9 pg/ml, 9% at 29 pg/ml, 5% at 87 pg/ml and 8% at 124 pg/ml ( $n = 14$  at each concentration).

**Untargeted metabolomic analysis.** Untargeted metabolomics LC-MS analysis was carried out on a Waters Acquity UPLC coupled to a QToF Premier mass spectrometer (Waters Corporation, Milford, MA, USA) with electrospray ionisation in positive ionisation mode as previously described by Pandher et al. (3, 4). Raw data were detected, aligned and processed using XCMS (5). Two-hourly plasma samples were thawed on ice before extraction using 100  $\mu\text{L}$  plasma and 400  $\mu\text{L}$  solvent (methanol/ethanol (1:1)) with a 30 s vortex step before centrifugation at 1500  $g$ . Extracts were transferred to 384-well plates for LC-MS analysis using a Biomek 2000 (Beckman Coulter, Inc., High Wycombe, UK).

A Waters Acquity HSS T3 C18 column (100 x 2.1 mm, internal diameter 1.8  $\mu\text{m}$ ) and a mobile phase consisting of water (A) and acetonitrile (B) (both containing 0.1% formic acid) were used for chromatographic separation, with a flow rate of 0.6 mL/min. The 14 minute elution gradient comprised the following: 100% A for 0.5 min, followed by a change to 100% B over 7 min, holding at 100%

B for 2 min, changing to 100 % A over 0.5 min before holding at 100% A for 4 minutes. The autosampler was maintained at 4°C, and the column was maintained at 50°C throughout the experiment. The injection volume was 10 µL. The MS instrument and data acquisition parameters were as described by Pandher et al. (3, 4). Quality control (QC) samples consisted of pooled plasma from all analysed samples and were run approximately 1 in every 10 injections in order to assess the analytical variability. Batch variation and within-run variation in the resulting dataset was corrected using QC sample data for each feature in a method adapted from Kamleh et al. (6). The correction factor for a given feature in a group of approximately 30 samples was the mean intensity of that feature in three QC injections included in that group. Probabilistic quotient normalisation (PQN) (7) and unit variance scaling was carried out on the batch-corrected dataset prior to multivariate data analysis.

**Metabolite identification (untargeted analysis).** Tandem MS (MS/MS) analysis was used to characterise the fragmentation pattern of each metabolite feature of interest (as determined by univariate and multivariate techniques) for identification using fragmentation patterns from our previous study (8), online database searching (METLIN, Human Metabolome Database) and/or with comparison with pure standards. MS/MS was carried out on the Waters QToF system described above with a 5 – 30V collision energy ramp and a 50 – 800 Da mass range.

**Targeted metabolomic analysis.** To identify and quantify metabolite concentrations, two-hourly plasma samples were measured using the AbsoluteIDQ p180 targeted metabolomics kit (Biocrates Life Sciences AG, Innsbruck, Austria), and a Waters Xevo TQ-S mass spectrometer coupled to an Acquity H LC system (Waters Corporation, Milford, MA, USA). The kit provided absolute concentrations for acylcarnitines, amino acids, biogenic amines, hexose, glycerophospholipids and sphingolipids. Plasma samples were prepared according to the manufacturer's instructions. To correct for variation between batches in the targeted analysis, a correction factor was applied to each metabolite concentration value. The correction factor was calculated as the ratio of the geometric mean of the plate-specific geometric means for each metabolite to the relevant plate-specific geometric mean (9).

**Statistical analysis.** For both untargeted and targeted analyses, Principal Component Analysis (PCA) was carried out using all data and Orthogonal Partial Least Squares Discriminant Analysis (OPLS-DA) was carried out on selected time points (SIMCA-P v11.0 software,

Umetrics, Sweden). To examine changes in metabolite levels across different time periods and time of day (study and analysis protocol in SI Appendix; Table S1), a two-way repeated ANOVA was carried out on selected time periods and their corresponding times of day for all 171 metabolites using MATLAB and Bioinformatics Toolbox Release 2013b (The MathWorks, Inc., Natick, Massachusetts, United States). In order to account for one missing sample when carrying out the two-way repeated ANOVA, simulated metabolite levels were generated using linear interpolation based on data from the same subject and metabolite. To correct for multiple hypotheses testing, false discovery rates and q-values were calculated using the mafdr function based on the Storey et al. method (10). Values of p and q < 0.05 and 0.05, respectively, were considered significant.

To assess 24 h metabolite rhythmicity, cosinor analysis (11) was carried out for each metabolite quantified in targeted analysis for both the first 24 h (day 1/N1, wake/sleep) and the subsequent 24 h (day 2/N2, wake/wake). For each metabolite profile, cosinor analysis was performed on the mean z-score values (z-score calculated across 48 h) across all subjects. Peak time (acrophase), amplitude and significance of fit ( $p < 0.05$ ) were determined in each case. The time of melatonin onset (dim light melatonin onset, DLMO) on both day 1 (sleep) and day 2 (sleep deprivation) was calculated for each participant using the 25% threshold method as previously described (2).

Over-representation analysis was performed with the IMPaLA web tool ([impala.molgen.mpg.de](http://impala.molgen.mpg.de)) (10), using the 27 metabolites significantly increased in sleep deprivation as the dataset of interest, and all 171 metabolites identified using targeted analysis as the background dataset. The IMPaLA tool provided p-values and corresponding false discovery rates (calculated using the Benjamini Hochberg method) for each pathway identified as over-represented.

## Results and Discussion

**Comparison of untargeted and targeted LC-MS analysis.** Twenty metabolites were common to both untargeted and targeted analyses (SI Appendix; Table S8). Pearson's correlation coefficients were calculated using all samples for each common metabolite. There was a significant correlation between untargeted and targeted analysis for each common metabolite ( $p < 0.001$  in all cases) (SI Appendix; Table S8).

**Over-representation analysis.** Over-representation analysis was performed with the IMPaLA web tool ([impala.molgen.mpg.de](http://impala.molgen.mpg.de)) (10). The top ten pathways were, in order of decreasing significance: metabolism of lipids and lipoproteins; signal transduction; glycerophospholipid metabolism; acyl chain remodelling of phosphatidylcholine; acyl chain remodelling of cardiolipin; serotonin transporter activity; opioid signalling; monoamine transport; linoleate metabolism; and HDL-mediated lipid transport. However, no pathways were identified as being significantly over-represented after the application of a false discovery rate correction.

**Comparison of identified rhythmic metabolites in this study to other studies.** We found that 25/40 acylcarnitines quantified with targeted analysis were rhythmic on day 1 (wake/sleep), with 11 of these acylcarnitines maintaining rhythmicity on day 2 (wake/wake). Acylcarnitine rhythmicity is in agreement with the study of Dallmann et al. (13) that reported some rhythmic acylcarnitines: laurycarnitine (dodecanoylcarnitine), octanoylcarnitine and cis-4-decanoylcarnitine. We found both dodecanoylcarnitine and octanoylcarnitine to be rhythmic on day 1 (wake/sleep) only, and both of these acylcarnitines were significantly increased during sleep deprivation (00:00 – 06:00 h, day 2) compared with during sleep (00:00 – 06:00 h, day 1). Consistent with Dallmann et al. (13), we found no rhythmicity on either day 1 or day 2 in hexanoylcarnitine, hexadecenoylcarnitine (palmitoylcarnitine) or tigylcarnitine. Some acylcarnitines that were not rhythmic during their constant routine protocol were rhythmic in our protocol. These were butyrylcarnitine and carnitine (rhythmic on day 1 and day 2); acetylcarnitine, decanoylcarnitine, octadecanoylcarnitine (stearoylcarnitine) and octanoylcarnitine (rhythmic on day 1 only); and propionylcarnitine (rhythmic on day 2 only).

Dallmann et al. (13) found only one amino acid, glutamate, to be rhythmic in plasma. Similarly glutamate was found to be rhythmic in our protocol on both days. Kasukawa et al. (14) identified three rhythmic amino acids in their constant routine protocol, namely phenylalanine, tryptophan and leucine, none of which were found to be rhythmic in plasma by Dallmann et al. (13) or in our protocol. Dallmann et al. (13) reported rhythmicity in arginine, histidine, serine, tyrosine and ornithine in saliva. In our protocol we also identified rhythmicity in ornithine on both days and in tyrosine only during continual wakefulness (day 2), but no rhythmicity in arginine, histidine or serine on either day.

Both constant routine studies (13, 14) reported the oscillation of many lipids during their respective protocols, and this rhythmicity is consistent with our study, in which 45/86 phospholipids and 13/14 sphingolipids maintained rhythmicity in the presence and absence of sleep. This finding is supported by transcriptomic data, with Archer et al. (15) reporting that transcripts

associated with lipid metabolism were robustly rhythmic, and not affected by altered sleep. Möller-Levet et al. (16) showed that genes associated with phospholipid transporter activity only exhibited circadian variation with sufficient sleep, which may be linked with the loss in rhythmicity of some phospholipids observed during continual wakefulness in our protocol. The authors also reported that lipid metabolism transcripts have maximum transcription levels during the day. This is supported by the metabolomics data, with the levels of most lipids peaking during the afternoon in our study and most lipid products peaking during mid-morning to noon in Dallmann's constant routine protocol (13). The differences in lipid peak timing during the day may reflect differences between the constant routine protocols (13, 16) and our protocol (sleep/wake; light/dark; meals).

**Comparison of metabolites changed significantly during sleep deprivation in this study to other studies.** Dallmann et al. (13) identified 34 metabolites in plasma and 27 in saliva that demonstrated a monotonic increase or decrease across their 40 h constant routine protocol and suggested that some of these metabolites may be associated with sleep pressure. One of these metabolites was serotonin which increased monotonically during the constant routine protocol. The significantly increased serotonin levels we observed during sleep deprivation compared to during sleep adds weight to this indoleamine being associated with high sleep pressure.

Our findings suggest that the increased levels of acylcarnitines observed during sleep deprivation may point to changes in the beta-oxidation of fatty acids, and the monotonic increase in plasma 3-hydroxydecanoate, an intermediate in the beta-oxidation of fatty acids, observed by Dallmann et al. (13) may support this hypothesis. By contrast, the monotonic changes in many of the plasma and saliva amino acids reported by Dallmann et al. (13) were not seen between the sleep and sleep deprivation periods in our protocol, likely reflecting differences in the feeding regimen between the two protocols. While Dallmann et al. (13) did not report an increase in tryptophan across their protocol, the authors showed a monotonic increase in plasma 3-indoxyl sulphate, a metabolite of tryptophan, lending support to the significantly increased tryptophan levels we observed during sleep deprivation.

## SI Appendix; References

1. Ackermann K, *et al.* (2012) Diurnal rhythms in blood cell populations and the effect of acute sleep deprivation in healthy young men. *Sleep* 35:933-940.
2. Sletten TL, Revell VL, Middleton B, Lederle KA, Skene DJ (2009) Age-related changes in acute and phase-advancing responses to monochromatic light. *J Biol Rhythms* 24:73-84.
3. Pandher R, Ducruix C, Eccles SA, Raynaud FI (2009) Cross-platform q-tof validation of global exo-metabolomic analysis: Application to human glioblastoma cells treated with the standard pi 3-kinase inhibitor ly294002. *J Chromatogr B Analyt Technol Biomed Life Sci* 877:1352-1358.
4. Pandher R, Naegele E, Fischer S, Raynaud F (2012) Improvement in the number of analytic features detected by non-targeted metabolomic analysis: Influence of the chromatographic system and ionisation technique. *Metabolomics*, ed Roessner U (InTech Europe, Rijeka, Croatia), pp 317-328.
5. Smith CA, Want EJ, O'Maille G, Abagyan R, Siuzdak G (2006) XCMS: Processing mass spectrometry data for metabolite profiling using nonlinear peak alignment, matching, and identification. *Anal Chem* 78:779-787.
6. Kamleh MA, Ebbels TM, Spagou K, Masson P, Want EJ (2012) Optimizing the use of quality control samples for signal drift correction in large-scale urine metabolic profiling studies. *Anal Chem* 84:2670-2677.
7. Dieterle F, Ross A, Schlotterbeck G, Senn H (2006) Probabilistic quotient normalization as robust method to account for dilution of complex biological mixtures. Application in <sup>1</sup>H NMR metabolomics. *Anal Chem* 78:4281-4290.
8. Ang JE, *et al.* (2012) Identification of human plasma metabolites exhibiting time-of-day variation using an untargeted liquid chromatography-mass spectrometry metabolomic approach. *Chronobiol Int* 29:868-881.
9. Then C, *et al.* (2013) Plasma metabolomics reveal alterations of sphingo- and glycerophospholipid levels in non-diabetic carriers of the transcription factor 7-like 2 polymorphism rs7903146. *PLoS one* 8:e78430.
10. Storey JD (2002) A direct approach to false discovery rates. *J Roy Stat Soc Ser B (Stat Method)* 64:479-498.
11. Minors D, Waterhouse J (1989) Analysis of biological time series. *Biological rhythms in clinical practice.*, eds Arendt J, Minors D, & Waterhouse J (Wright, London), pp 272-293.
12. Kamburov A, Cavill R, Ebbels TM, Herwig R, Keun HC (2011) Integrated pathway-level analysis of transcriptomics and metabolomics data with IMPaLA. *Bioinformatics* 27: 2917-2918.
13. Dallmann R, Viola AU, Tarokh L, Cajochen C, Brown SA (2012) The human circadian metabolome. *Proc Natl Acad Sci U S A* 109:2625-2629.
14. Kasukawa T, *et al.* (2012) Human blood metabolite timetable indicates internal body time. *Proc Natl Acad Sci U S A* 109:15036-15041.
15. Archer SN, *et al.* (2014) Mistimed sleep disrupts circadian regulation of the human transcriptome. *Proc Natl Acad Sci U S A*:201316335.
16. Möller-Levet CS, *et al.* (2013) Effects of insufficient sleep on circadian rhythmicity and expression amplitude of the human blood transcriptome. *Proc Natl Acad Sci U S A* 110:E1132-E1141.

**Figure S1**

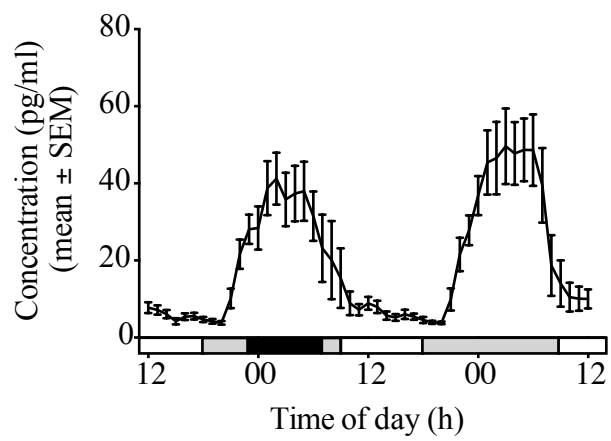

**Figure S1.** Mean ( $\pm$  SEM) melatonin concentrations ( $n = 12$ ) over the 48-h sampling protocol. The black bar indicates the sleep period, 0 lux, supine; grey bars, wake periods, semi-recumbent position, < 5 lux; white bars, awake and free movement, 100 lux.



**Figure S2**

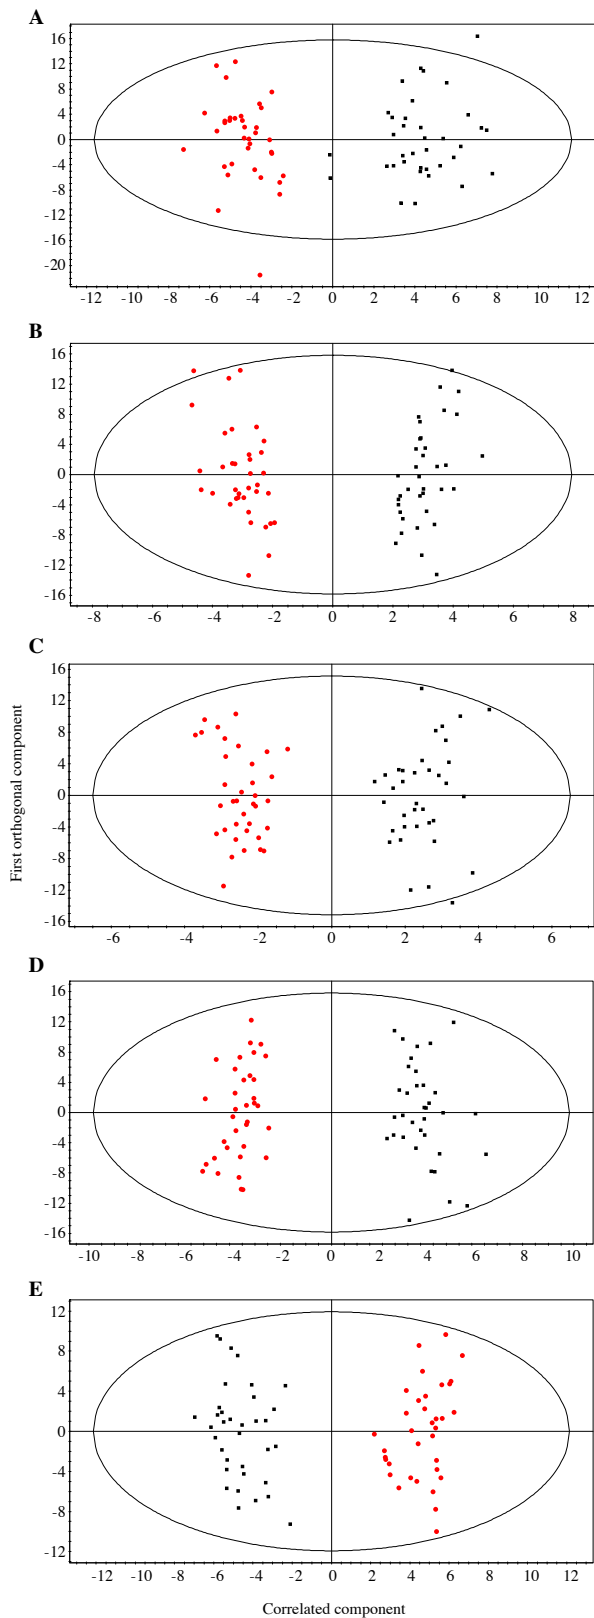

**Figure S2.** OPLS-DA models (validated by permutation analysis) of targeted metabolomics data in which selected time points on day 1 were separated according to time of day. A. Black squares – 12:00 – 16:00 h; red circles – 00:00 – 04:00 h;  $R^2X$  (cumulative) = 0.606,  $R^2Y$  (cumulative) = 0.897,  $Q^2$  (cumulative) = 0.789. B. Black squares – 16:00 – 20:00 h; red circles – 04:00 – 08:00 h;  $R^2X$  (cumulative) = 0.640,  $R^2Y$  (cumulative) = 0.951,  $Q^2$  (cumulative) = 0.852. C. Black squares – 18:00 – 22:00 h; red circles – 06:00 – 10:00 h;  $R^2X$  (cumulative) = 0.627,  $R^2Y$  (cumulative) = 0.937,  $Q^2$  (cumulative) = 0.757. D. Black squares – 20:00 – 00:00 h; red circles – 08:00 – 12:00 h;  $R^2X$  (cumulative) = 0.632,  $R^2Y$  (cumulative) = 0.954,  $Q^2$  (cumulative) = 0.828. E. Black squares – 22:00 – 02:00 h; red circles – 10:00 – 14:00 h;  $R^2X$  (cumulative) = 0.636,  $R^2Y$  (cumulative) = 0.943,  $Q^2$  (cumulative) = 0.847.

**Figure S3**

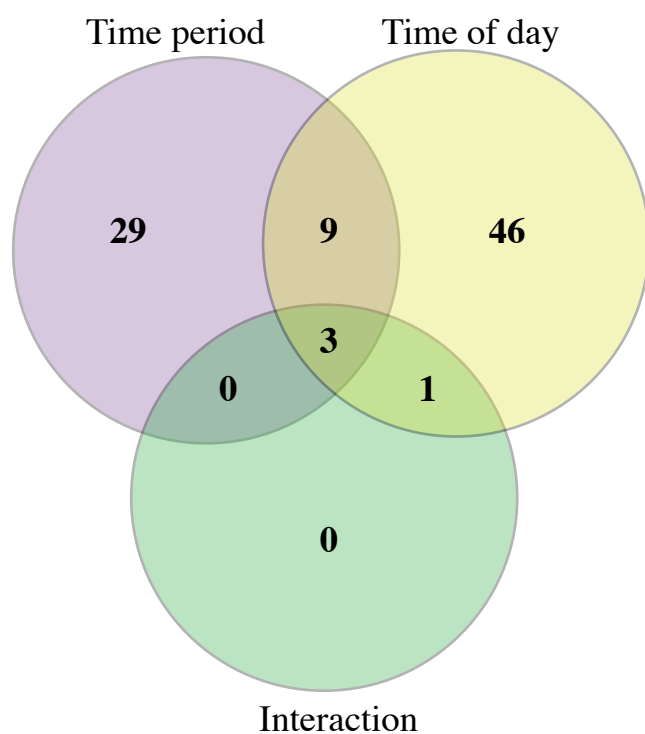

**Figure S3.** A Venn diagram showing the number of significant metabolites ( $p < 0.05$  and  $q < 0.05$ ) derived from repeated two-way ANOVA of the time period (sleep 00:00 – 06:00 h; sleep deprivation 00:00 – 06:00 h), time of day (00:00, 02:00, 04:00, 06:00 h) and time period\*time of day interaction.

Figure S4

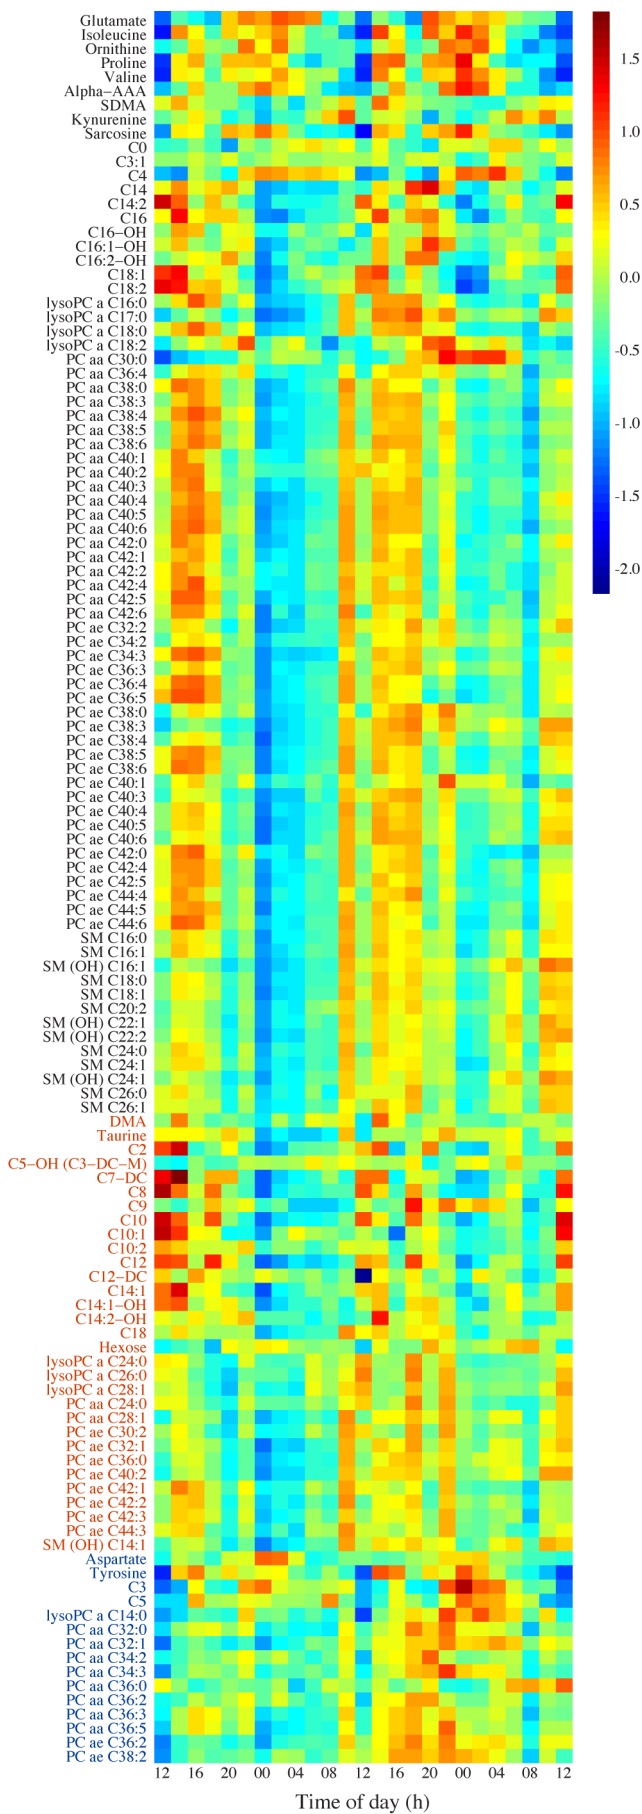

**Figure S4.** A heat map of all metabolites showing diurnal rhythms with significant fits to a cosine curve ( $n = 109$ ). Mean z-score values for all subjects ( $n = 12$ ) are shown (z-scores calculated across 48 h). High levels of metabolites are shown in red and low levels are shown in blue. The metabolites are divided into those that exhibited significant cosinor rhythms on both day 1 and day 2 ( $n=78$ , black labels), on day 1 only ( $n = 31$ , red labels) and on day 2 only ( $n = 15$ , blue labels). A full description of the cosinor analysis (acrophase, amplitude) for each metabolite is detailed in Table S6.

**Figure S5**

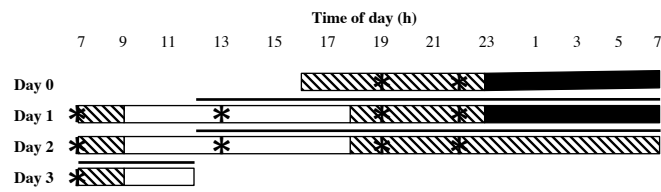

**Figure S5.** In-laboratory study protocol comprising 24 h wake/sleep followed by 24 h of wakefulness. White sections indicate wake periods (wake, 100 lux, free movement); hatched sections – wake, semi-recumbent position, < 5 lux; black sections – sleeping with eye masks, 0 lux, supine. Asterisks represent standardized meals; black bars represent hourly blood sampling across 48 h.

**Figure S6**

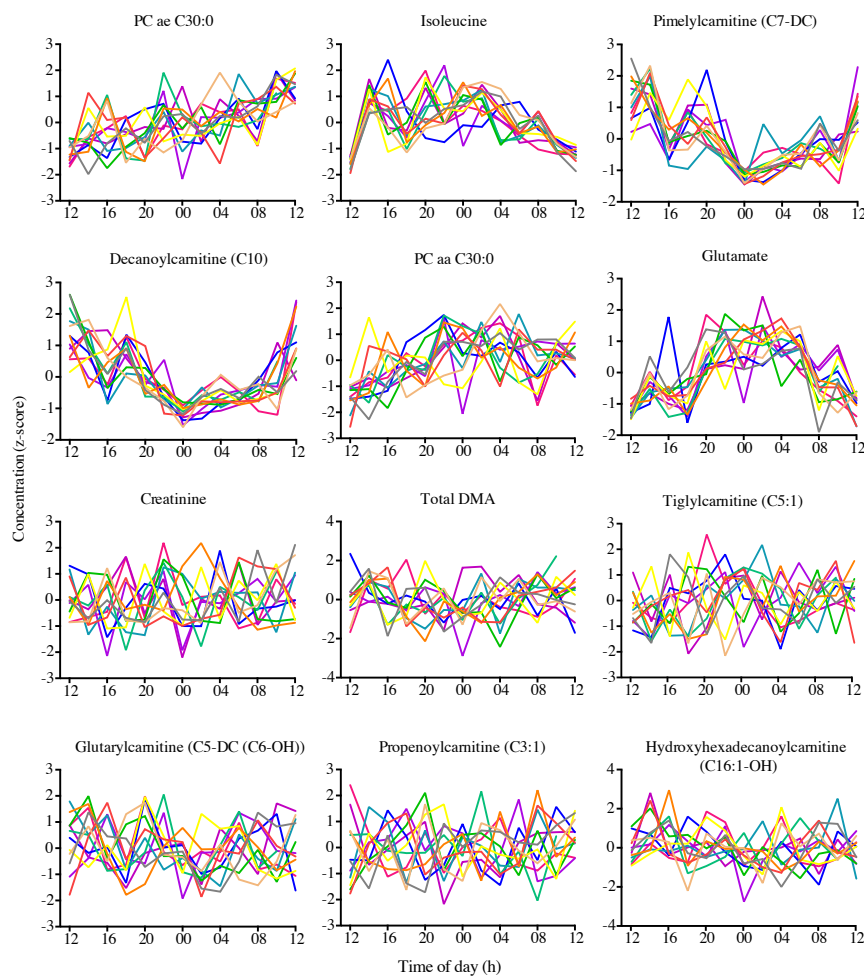

**Figure S6.** Concentrations of the six metabolites that vary least (PC ae C30:0, isoleucine, pimelylcarnitine, decanoylcarnitine, PC aa C30:0, glutamate) and the six that vary most (creatinine, total DMA, tiglylcarnitine, glutaryl carnitine, propenoylcarnitine, hydroxyhexadecanoylcarnitine) between individuals across day 1. Z-scored concentrations for each subject (n = 12) are shown.

Table S1: Study and analysis protocol illustrating the time periods and time of day. Two-way repeated ANOVA was carried out on the time periods shown and their corresponding times of day for all 171 metabolites measured.

| Time of day    |            | Time period |         |         |         |
|----------------|------------|-------------|---------|---------|---------|
| Clock time (h) | Time point | 1           | 2       | 3       | 4       |
| 12:00          | 1          |             |         |         |         |
| 14:00          | 2          | Level 1     |         |         | Level 1 |
| 16:00          | 3          | Level 1     |         |         | Level 1 |
| 18:00          | 4          | Level 1     |         |         | Level 1 |
| 20:00          | 5          | Level 1     |         |         | Level 1 |
| 22:00          | 6          | Level 1     |         |         | Level 1 |
| 00:00          | 7          | Level 1     | Level 1 | Level 1 |         |
| 02:00          | 8          | Level 1     | Level 1 | Level 1 |         |
| 04:00          | 9          | Level 1     | Level 1 | Level 1 |         |
| 06:00          | 10         | Level 1     | Level 1 | Level 1 |         |
| 08:00          | 11         | Level 1     | Level 1 |         |         |
| 10:00          | 12         | Level 1     | Level 1 |         |         |
| 12:00          | 13         | Level 1     | Level 1 |         |         |
| 14:00          | 14         | Level 2     |         |         | Level 2 |
| 16:00          | 15         | Level 2     |         |         | Level 2 |
| 18:00          | 16         | Level 2     |         |         | Level 2 |
| 20:00          | 17         | Level 2     |         |         | Level 2 |
| 22:00          | 18         | Level 2     |         |         | Level 2 |
| 00:00          | 19         | Level 2     | Level 2 | Level 2 |         |
| 02:00          | 20         | Level 2     | Level 2 | Level 2 |         |
| 04:00          | 21         | Level 2     | Level 2 | Level 2 |         |
| 06:00          | 22         | Level 2     | Level 2 | Level 2 |         |
| 08:00          | 23         | Level 2     | Level 2 |         |         |
| 10:00          | 24         | Level 2     | Level 2 |         |         |
| 12:00          | 25         | Level 2     | Level 2 |         |         |

Time point 1 was not used in the two-way repeated ANOVA analysis in order to balance the number of time points compared between time periods.

Table S2: OPLS-DA models (targeted analysis data) p(corr) values of the measured metabolites in models comparing sleep (00:00 – 06:00 h, N1) with sleep deprivation (00:00 – 06:00 h, N2) (sleep status); 14:00 – 18:00 h with 02:00 - 06:00 h, day 1; 14:00 – 18:00 h with 02:00 - 06:00 h, day 2.

| Sleep status                              |         | Day 1<br>14:00 - 18:00 vs 02:00 - 06:00 h |         | Day 2<br>14:00 - 18:00 vs 02:00 - 06:00 h |         |
|-------------------------------------------|---------|-------------------------------------------|---------|-------------------------------------------|---------|
| Metabolite                                | p(corr) | Metabolite                                | p(corr) | Metabolite                                | p(corr) |
| Glutamate                                 | -0.294  | Octadecadienylcarnitine (C18:2)           | -0.661  | Butyrylcarnitine (C4)                     | -0.551  |
| Decenoylcarnitine (C10:1)                 | -0.185  | Dodecanoylcarnitine (C12)                 | -0.657  | Glutamate                                 | -0.505  |
| Decadienylcarnitine (C10:2)               | -0.104  | Hexadecanoylcarnitine (C16)               | -0.652  | Propionylcarnitine (C3)                   | -0.444  |
| Propenoylcarnitine (C3:1)                 | -0.100  | Tetradecanoylcarnitine (C14)              | -0.640  | PC aa C30:0                               | -0.416  |
| Octadecadienylcarnitine (C18:2)           | -0.091  | Decanoylcarnitine (C10)                   | -0.635  | Valerylcarnitine (C5)                     | -0.282  |
| Hydroxybutyrylcarnitine (C3-DC (C4-OH))   | -0.089  | Tetradecadienylcarnitine (C14:2)          | -0.583  | Carnitine (C0)                            | -0.242  |
| lysoPC a C24:0                            | -0.087  | PC aa C42:5                               | -0.549  | PC ae C30:0                               | -0.241  |
| Citrulline                                | -0.085  | Octanoylcarnitine (C8)                    | -0.536  | PC ae C34:0                               | -0.227  |
| PC aa C26:0                               | -0.060  | Pimelylcarnitine (C7-DC)                  | -0.535  | Asymmetric dimethylarginine (ADMA)        | -0.200  |
| Aspartate                                 | -0.033  | PC aa C38:0                               | -0.535  | Hydroxybutyrylcarnitine (C3-DC (C4-OH))   | -0.192  |
| Hydroxypropionylcarnitine (C3-OH)         | -0.025  | PC ae C40:5                               | -0.529  | lysoPC a C14:0                            | -0.183  |
| Total Dimethylarginine (DMA)              | -0.025  | PC ae C42:5                               | -0.526  | Butenylcarnitine (C4:1)                   | -0.165  |
| PC aa C24:0                               | -0.024  | Hydroxytetradecenoylcarnitine C14:1-OH    | -0.521  | Hexose                                    | -0.160  |
| Butenylcarnitine (C4:1)                   | -0.023  | PC ae C38:5                               | -0.514  | Taurine                                   | -0.142  |
| PC aa C40:2                               | -0.020  | PC aa C38:6                               | -0.507  | Nonacylcarnitine (C9)                     | -0.115  |
| Dodecanedioylcarnitine (C12-DC)           | -0.018  | Phenylalanine                             | -0.498  | Citrulline                                | -0.114  |
| Methylglutaryl carnitine (C5-M-DC)        | -0.017  | PC ae C38:6                               | -0.496  | Serotonin                                 | -0.108  |
| Hexose                                    | -0.015  | Alanine                                   | -0.496  | Valine                                    | -0.099  |
| Hydroxyvalerylcarnitine (C5-OH (C3-DC-M)) | -0.014  | PC aa C42:4                               | -0.492  | Hydroxypropionylcarnitine (C3-OH)         | -0.090  |
| Glutamine                                 | -0.009  | Taurine                                   | -0.490  | Threonine                                 | -0.086  |
| lysoPC a C26:0                            | -0.008  | Octadecenoylcarnitine (C18:1)             | -0.486  | PC aa C34:4                               | -0.082  |
| Histidine                                 | -0.005  | Hexadecenoylcarnitine (C16:1)             | -0.482  | Glycine                                   | -0.078  |
| Hexadecadienylcarnitine (C16:2)           | -0.005  | PC ae C44:5                               | -0.480  | Hydroxyvalerylcarnitine (C5-OH (C3-DC-M)) | -0.076  |

|                                         |        |                                |        |                                          |        |
|-----------------------------------------|--------|--------------------------------|--------|------------------------------------------|--------|
| PC ae C42:0                             | -0.003 | PC aa C40:6                    | -0.480 | PC aa C32:3                              | -0.067 |
| Dodecenoylcarnitine (C12:1)             | -0.002 | PC ae C42:0                    | -0.475 | Ornithine                                | -0.062 |
| lysoPC a C26:1                          | 0.020  | PC ae C42:4                    | -0.473 | Decenoylcarnitine (C10:1)                | -0.045 |
| PC aa C34:2                             | 0.022  | PC ae C44:6                    | -0.470 | PC aa C36:0                              | -0.043 |
| Kynurenine                              | 0.026  | PC ae C40:6                    | -0.460 | Aspartate                                | -0.043 |
| PC aa C36:2                             | 0.029  | PC aa C42:0                    | -0.458 | lysoPC a C18:2                           | -0.041 |
| SM C24:0                                | 0.030  | PC ae C36:5                    | -0.456 | Tiglylcarnitine (C5:1)                   | -0.040 |
| Hexadecenoylcarnitine (C16:1)           | 0.032  | PC aa C40:2                    | -0.443 | Hydroxyhexanoylcarnitine (C5-DC (C6-OH)) | -0.040 |
| Glycine                                 | 0.036  | PC ae C34:3                    | -0.442 | Dodecenoylcarnitine (C12:1)              | -0.035 |
| PC ae C42:1                             | 0.045  | PC ae C36:4                    | -0.441 | PC aa C32:1                              | -0.031 |
| Octadecenoylcarnitine (C18:1)           | 0.046  | PC ae C40:4                    | -0.438 | Propenoylcarnitine (C3:1)                | -0.026 |
| Arginine                                | 0.049  | Tetradecenoylcarnitine (C14:1) | -0.432 | Alpha-Aminoadipic acid (alpha-AAA)       | -0.015 |
| PC aa C40:6                             | 0.053  | PC aa C42:1                    | -0.431 | Kynurenine                               | 0.004  |
| PC ae C30:1                             | 0.056  | PC aa C40:3                    | -0.430 | lysoPC a C18:1                           | 0.011  |
| SM C26:0                                | 0.058  | PC aa C40:1                    | -0.423 | Hexanoylcarnitine (C6 (C4:1-DC))         | 0.014  |
| PC aa C42:2                             | 0.059  | PC aa C38:4                    | -0.409 | Glutaconylcarnitine (C5:1-DC)            | 0.015  |
| SM C24:1                                | 0.059  | Tryptophan                     | -0.408 | Dodecanedioylcarnitine (C12-DC)          | 0.039  |
| Carnitine (C0)                          | 0.060  | lysoPC a C16:0                 | -0.402 | PC aa C34:2                              | 0.048  |
| Ornithine                               | 0.062  | PC aa C40:5                    | -0.401 | PC aa C34:3                              | 0.048  |
| Leucine                                 | 0.062  | PC aa C42:2                    | -0.400 | PC ae C30:1                              | 0.049  |
| Creatinine                              | 0.064  | PC ae C38:4                    | -0.384 | SM (OH) C24:1                            | 0.050  |
| PC aa C36:0                             | 0.065  | lysoPC a C18:0                 | -0.384 | lysoPC a C16:1                           | 0.052  |
| PC aa C42:4                             | 0.066  | PC aa C40:4                    | -0.381 | Isoleucine                               | 0.070  |
| lysoPC a C18:0                          | 0.067  | PC aa C38:5                    | -0.371 | lysoPC a C20:3                           | 0.073  |
| Sarcosine                               | 0.068  | Tyrosine                       | -0.368 | PC ae C40:1                              | 0.082  |
| PC aa C40:1                             | 0.070  | SM C16:0                       | -0.363 | lysoPC a C20:4                           | 0.085  |
| Hydroxyoctadecenoylcarnitine (C18:1-OH) | 0.075  | PC aa C36:4                    | -0.358 | Hydroxyoctadecenoylcarnitine (C18:1-OH)  | 0.086  |
| PC ae C44:4                             | 0.076  | PC ae C44:4                    | -0.356 | PC ae C36:0                              | 0.088  |
| Alpha-Aminoadipic acid (alpha-AAA)      | 0.079  | Acetylcarnitine (C2)           | -0.352 | Serine                                   | 0.092  |
| PC ae C44:3                             | 0.083  | PC ae C40:3                    | -0.349 | PC aa C36:2                              | 0.096  |



|                                           |       |                                            |        |                                       |       |
|-------------------------------------------|-------|--------------------------------------------|--------|---------------------------------------|-------|
| lysoPC a C28:0                            | 0.084 | SM C18:0                                   | -0.344 | PC aa C32:0                           | 0.096 |
| PC aa C38:3                               | 0.084 | PC ae C40:2                                | -0.337 | Tryptophan                            | 0.097 |
| PC aa C38:0                               | 0.087 | PC aa C42:6                                | -0.334 | PC aa C34:1                           | 0.101 |
| SM (OH) C24:1                             | 0.088 | Hydroxyhexadecenoylcarnitine (C16:1-OH)    | -0.329 | Acetylcarnitine (C2)                  | 0.102 |
| Alanine                                   | 0.090 | Dodecenoylcarnitine (C12:1)                | -0.328 | Hexadecadienylcarnitine (C16:2)       | 0.105 |
| Serine                                    | 0.090 | Hydroxyhexadecanoylcarnitine (C16-OH)      | -0.315 | SM (OH) C22:1                         | 0.107 |
| Butyrylcarnitine (C4)                     | 0.091 | Octadecanoylcarnitine (C18)                | -0.313 | Tetradecenoylcarnitine (C14:1)        | 0.107 |
| Hydroxyhexadecadienylcarnitine (C16:2-OH) | 0.097 | PC ae C36:3                                | -0.311 | SM C24:0                              | 0.107 |
| lysoPC a C20:4                            | 0.100 | SM (OH) C16:1                              | -0.310 | Sarcosine                             | 0.115 |
| PC aa C38:4                               | 0.100 | SM C16:1                                   | -0.304 | PC aa C36:1                           | 0.115 |
| Hydroxyhexanoylcarnitine (C5-DC (C6-OH))  | 0.101 | PC aa C38:3                                | -0.303 | Creatinine                            | 0.124 |
| SM C26:1                                  | 0.102 | Glutamine                                  | -0.294 | lysoPC a C26:1                        | 0.130 |
| PC aa C40:5                               | 0.103 | Hydroxyhexadecadienylcarnitine (C16:2-OH)  | -0.293 | Lysine                                | 0.132 |
| PC aa C42:6                               | 0.103 | SM C24:1                                   | -0.293 | PC ae C34:1                           | 0.136 |
| Hydroxyhexadecanoylcarnitine (C16-OH)     | 0.106 | PC ae C34:2                                | -0.290 | lysoPC a C28:1                        | 0.139 |
| PC aa C34:1                               | 0.107 | PC ae C38:0                                | -0.286 | SM (OH) C22:2                         | 0.141 |
| PC aa C38:6                               | 0.108 | SM C18:1                                   | -0.284 | Hexenoylcarnitine (C6:1)              | 0.149 |
| PC ae C44:6                               | 0.109 | Symmetrical Dimethylarginine (SDMA)        | -0.279 | PC ae C36:2                           | 0.154 |
| PC aa C42:1                               | 0.114 | PC aa C32:0                                | -0.279 | SM (OH) C16:1                         | 0.156 |
| Tiglylcarnitine (C5:1)                    | 0.114 | SM (OH) C14:1                              | -0.276 | PC ae C36:1                           | 0.156 |
| PC ae C36:4                               | 0.116 | Serotonin                                  | -0.273 | SM (OH) C14:1                         | 0.158 |
| Asymmetric dimethylarginine (ADMA)        | 0.117 | PC ae C32:2                                | -0.273 | Hydroxyhexadecanoylcarnitine (C16-OH) | 0.161 |
| PC ae C38:2                               | 0.119 | SM (OH) C22:2                              | -0.272 | SM C26:1                              | 0.161 |
| lysoPC a C28:1                            | 0.120 | Hydroxytetradecadienylcarnitine (C14:2-OH) | -0.271 | SM C26:0                              | 0.163 |
| PC aa C40:3                               | 0.123 | Decenoylcarnitine (C10:1)                  | -0.269 | PC aa C28:1                           | 0.164 |
| PC aa C42:5                               | 0.123 | Nonaylcarnitine (C9)                       | -0.267 | PC aa C26:0                           | 0.168 |
| PC aa C42:0                               | 0.124 | PC ae C42:3                                | -0.266 | PC ae C42:2                           | 0.169 |
| Hexenoylcarnitine (C6:1)                  | 0.125 | SM C20:2                                   | -0.265 | PC aa C36:6                           | 0.169 |
| lysoPC a C16:0                            | 0.126 | PC ae C32:1                                | -0.265 | Decadienylcarnitine (C10:2)           | 0.174 |
| Hexanoylcarnitine (C6 (C4:1-DC))          | 0.129 | PC ae C42:2                                | -0.262 | PC ae C38:2                           | 0.177 |

|                                         |       |                                         |        |                                        |       |
|-----------------------------------------|-------|-----------------------------------------|--------|----------------------------------------|-------|
| PC ae C38:6                             | 0.133 | Dodecanedioylcarnitine (C12-DC)         | -0.260 | lysoPC a C28:0                         | 0.179 |
| PC ae C36:5                             | 0.133 | PC aa C36:3                             | -0.251 | SM C18:1                               | 0.182 |
| Lysine                                  | 0.135 | SM C26:1                                | -0.247 | PC aa C36:5                            | 0.183 |
| Tetradecenoylcarnitine (C14:1)          | 0.136 | PC ae C36:0                             | -0.247 | PC ae C40:2                            | 0.184 |
| SM C16:1                                | 0.136 | PC ae C42:1                             | -0.247 | PC ae C42:3                            | 0.184 |
| Glutaconylcarnitine (C5:1-DC)           | 0.136 | PC aa C36:1                             | -0.245 | Methylglutaryl carnitine (C5-M-DC)     | 0.187 |
| Symmetrical Dimethylarginine (SDMA)     | 0.137 | PC ae C44:3                             | -0.243 | PC ae C34:2                            | 0.194 |
| SM (OH) C22:1                           | 0.139 | Hexadecadienylcarnitine (C16:2)         | -0.237 | PC aa C36:3                            | 0.196 |
| lysoPC a C20:3                          | 0.139 | Proline                                 | -0.231 | Octanoylcarnitine (C8)                 | 0.198 |
| Asparagine                              | 0.142 | PC aa C28:1                             | -0.228 | SM C16:1                               | 0.199 |
| PC ae C44:5                             | 0.151 | PC aa C36:5                             | -0.223 | Arginine                               | 0.201 |
| PC ae C30:2                             | 0.152 | lysoPC a C17:0                          | -0.220 | PC ae C32:1                            | 0.202 |
| PC ae C36:3                             | 0.154 | Hexenoylcarnitine (C6:1)                | -0.218 | Hydroxytetradecenoylcarnitine C14:1-OH | 0.203 |
| Isoleucine                              | 0.158 | SM C26:0                                | -0.212 | SM C20:2                               | 0.203 |
| PC aa C36:4                             | 0.159 | PC ae C34:1                             | -0.211 | Histidine                              | 0.204 |
| lysoPC a C18:2                          | 0.160 | Hexanoylcarnitine (C6 (C4:1-DC))        | -0.201 | Symmetrical Dimethylarginine (SDMA)    | 0.204 |
| PC aa C40:4                             | 0.160 | Glutaconylcarnitine (C5:1-DC)           | -0.194 | Methionine                             | 0.206 |
| PC ae C38:5                             | 0.161 | Decadienylcarnitine (C10:2)             | -0.188 | PC ae C38:3                            | 0.207 |
| Proline                                 | 0.163 | Methionine                              | -0.187 | SM C24:1                               | 0.207 |
| Hydroxyhexadecenoylcarnitine (C16:1-OH) | 0.167 | PC ae C40:1                             | -0.185 | PC ae C42:1                            | 0.207 |
| PC ae C42:3                             | 0.168 | SM C24:0                                | -0.181 | PC aa C36:4                            | 0.210 |
| PC aa C38:5                             | 0.172 | SM (OH) C22:1                           | -0.178 | Asparagine                             | 0.211 |
| PC ae C42:4                             | 0.176 | PC ae C38:3                             | -0.176 | Tetradecadienylcarnitine (C14:2)       | 0.212 |
| PC ae C42:5                             | 0.179 | PC aa C36:6                             | -0.175 | PC ae C30:2                            | 0.214 |
| Tetradecadienylcarnitine (C14:2)        | 0.179 | Leucine                                 | -0.166 | Leucine                                | 0.226 |
| Octadecanoylcarnitine (C18)             | 0.180 | Hydroxyoctadecenoylcarnitine (C18:1-OH) | -0.164 | Octadecanoylcarnitine (C18)            | 0.234 |
| PC ae C34:2                             | 0.182 | lysoPC a C20:4                          | -0.152 | PC ae C44:3                            | 0.234 |
| Valine                                  | 0.183 | Kynurenine                              | -0.151 | SM C18:0                               | 0.241 |
| PC aa C36:3                             | 0.187 | lysoPC a C16:1                          | -0.151 | PC ae C36:3                            | 0.247 |
| SM C18:1                                | 0.187 | PC ae C36:1                             | -0.149 | PC ae C36:5                            | 0.248 |

|                                            |       |                                          |        |                                            |       |
|--------------------------------------------|-------|------------------------------------------|--------|--------------------------------------------|-------|
| Pimelylcarnitine (C7-DC )                  | 0.187 | Hydroxyhexanoylcarnitine (C5-DC (C6-OH)) | -0.149 | Total Dimethylarginine (DMA)               | 0.250 |
| PC aa C34:3                                | 0.188 | lysoPC a C18:1                           | -0.146 | Pimelylcarnitine (C7-DC )                  | 0.252 |
| SM C16:0                                   | 0.191 | SM (OH) C24:1                            | -0.144 | SM C16:0                                   | 0.252 |
| Acetylcarnitine (C2)                       | 0.193 | Arginine                                 | -0.134 | PC ae C38:0                                | 0.254 |
| Hexadecanoylcarnitine (C16)                | 0.196 | Total Dimethylarginine (DMA)             | -0.129 | Hydroxytetradecadienylcarnitine (C14:2-OH) | 0.260 |
| PC ae C34:3                                | 0.198 | PC ae C30:2                              | -0.125 | PC ae C32:2                                | 0.264 |
| PC ae C42:2                                | 0.200 | Sarcosine                                | -0.101 | Dodecanoylcarnitine (C12)                  | 0.272 |
| SM C18:0                                   | 0.208 | lysoPC a C20:3                           | -0.093 | lysoPC a C26:0                             | 0.278 |
| Hydroxytetradecadienylcarnitine (C14:2-OH) | 0.210 | PC aa C34:1                              | -0.083 | lysoPC a C24:0                             | 0.280 |
| Phenylalanine                              | 0.211 | PC ae C36:2                              | -0.081 | Decanoylcarnitine (C10 )                   | 0.284 |
| PC ae C40:1                                | 0.213 | Isoleucine                               | -0.069 | Tyrosine                                   | 0.285 |
| PC ae C38:0                                | 0.219 | PC aa C34:3                              | -0.068 | PC ae C34:3                                | 0.286 |
| PC aa C32:1                                | 0.225 | PC aa C24:0                              | -0.065 | Hydroxyhexadecadienylcarnitine (C16:2-OH)  | 0.289 |
| SM (OH) C22:2                              | 0.225 | Asparagine                               | -0.057 | lysoPC a C17:0                             | 0.291 |
| SM C20:2                                   | 0.233 | Histidine                                | -0.054 | PC ae C44:6                                | 0.291 |
| Methionine                                 | 0.235 | Valerylcarnitine (C5)                    | -0.052 | PC aa C42:6                                | 0.298 |
| lysoPC a C18:1                             | 0.235 | lysoPC a C24:0                           | -0.051 | PC aa C24:0                                | 0.299 |
| PC aa C36:6                                | 0.236 | lysoPC a C28:1                           | -0.046 | PC aa C40:4                                | 0.301 |
| PC aa C36:5                                | 0.241 | PC aa C32:3                              | -0.045 | PC ae C44:5                                | 0.301 |
| Hydroxytetradecenoylcarnitine C14:1-OH     | 0.241 | PC aa C32:1                              | -0.043 | PC aa C42:0                                | 0.306 |
| PC ae C32:2                                | 0.242 | PC aa C36:0                              | -0.039 | Hexadecenoylcarnitine (C16:1)              | 0.307 |
| lysoPC a C16:1                             | 0.243 | PC aa C34:4                              | -0.029 | PC aa C38:5                                | 0.309 |
| Threonine                                  | 0.250 | lysoPC a C26:0                           | -0.023 | PC ae C36:4                                | 0.310 |
| PC aa C32:3                                | 0.253 | lysoPC a C18:2                           | -0.018 | PC ae C40:4                                | 0.315 |
| PC aa C34:4                                | 0.255 | lysoPC a C26:1                           | 0.008  | PC aa C38:3                                | 0.316 |
| PC aa C36:1                                | 0.258 | Propenoylcarnitine (C3:1)                | 0.022  | PC ae C38:4                                | 0.319 |
| Tetradecanoylcarnitine (C14)               | 0.267 | Lysine                                   | 0.039  | Hydroxyhexadecenoylcarnitine (C16:1-OH)    | 0.326 |
| PC ae C40:4                                | 0.269 | PC aa C36:2                              | 0.039  | Octadecenoylcarnitine (C18:1)              | 0.326 |
| PC ae C40:6                                | 0.274 | Ornithine                                | 0.047  | Proline                                    | 0.328 |
| Tyrosine                                   | 0.277 | Methylglutarylcarnitine (C5-M-DC)        | 0.055  | PC aa C38:4                                | 0.336 |

|                           |       |                                           |       |                                 |       |
|---------------------------|-------|-------------------------------------------|-------|---------------------------------|-------|
| Octanoylcarnitine (C8)    | 0.278 | Asymmetric dimethylarginine (ADMA)        | 0.056 | Glutamine                       | 0.339 |
| PC ae C40:3               | 0.285 | Threonine                                 | 0.065 | PC ae C40:3                     | 0.346 |
| Serotonin                 | 0.292 | PC aa C34:2                               | 0.074 | PC ae C38:6                     | 0.351 |
| Valerylcarnitine (C5)     | 0.293 | lysoPC a C28:0                            | 0.077 | PC ae C42:5                     | 0.355 |
| lysoPC a C17:0            | 0.296 | lysoPC a C14:0                            | 0.080 | PC aa C42:1                     | 0.357 |
| PC ae C36:0               | 0.298 | PC ae C30:1                               | 0.087 | PC ae C38:5                     | 0.360 |
| SM (OH) C14:1             | 0.299 | PC ae C34:0                               | 0.087 | PC aa C40:5                     | 0.360 |
| PC ae C38:3               | 0.301 | Hydroxybutyrylcarnitine (C3-DC (C4-OH))   | 0.089 | PC ae C42:4                     | 0.366 |
| PC ae C32:1               | 0.304 | PC ae C38:2                               | 0.092 | PC ae C40:5                     | 0.370 |
| Decanoylcarnitine (C10)   | 0.306 | Valine                                    | 0.093 | PC ae C44:4                     | 0.375 |
| PC ae C38:4               | 0.308 | Alpha-Aminoadipic acid (alpha-AAA)        | 0.116 | PC aa C42:4                     | 0.381 |
| PC aa C28:1               | 0.312 | PC aa C26:0                               | 0.126 | Tetradecanoylcarnitine (C14)    | 0.386 |
| Dodecanoylcarnitine (C12) | 0.314 | Creatinine                                | 0.130 | PC aa C40:3                     | 0.398 |
| PC ae C36:2               | 0.320 | Aspartate                                 | 0.131 | lysoPC a C16:0                  | 0.401 |
| PC ae C40:5               | 0.321 | Hydroxypropionylcarnitine (C3-OH)         | 0.141 | PC aa C38:0                     | 0.407 |
| PC ae C40:2               | 0.324 | Glycine                                   | 0.146 | PC aa C42:2                     | 0.408 |
| PC aa C32:0               | 0.328 | Serine                                    | 0.160 | lysoPC a C18:0                  | 0.420 |
| lysoPC a C14:0            | 0.339 | Tiglylcarnitine (C5:1)                    | 0.165 | PC ae C40:6                     | 0.422 |
| Propionylcarnitine (C3)   | 0.349 | Butenylcarnitine (C4:1)                   | 0.178 | PC aa C40:2                     | 0.424 |
| PC aa C30:0               | 0.388 | Citrulline                                | 0.186 | PC aa C40:1                     | 0.434 |
| SM (OH) C16:1             | 0.395 | Hydroxyvalerylcarnitine (C5-OH (C3-DC-M)) | 0.216 | Phenylalanine                   | 0.437 |
| PC ae C34:1               | 0.405 | PC ae C30:0                               | 0.255 | PC aa C40:6                     | 0.461 |
| PC ae C36:1               | 0.415 | Propionylcarnitine (C3)                   | 0.264 | PC ae C42:0                     | 0.462 |
| Tryptophan                | 0.450 | Carnitine (C0)                            | 0.279 | PC aa C42:5                     | 0.469 |
| Nonacylcarnitine (C9)     | 0.468 | PC aa C30:0                               | 0.302 | PC aa C38:6                     | 0.473 |
| Taurine                   | 0.537 | Hexose                                    | 0.331 | Octadecadienylcarnitine (C18:2) | 0.476 |
| PC ae C34:0               | 0.540 | Butyrylcarnitine (C4)                     | 0.349 | Hexadecanoylcarnitine (C16)     | 0.499 |
| PC ae C30:0               | 0.542 | Glutamate                                 | 0.678 | Alanine                         | 0.518 |

Table S3: OPLS-DA models (targeted analysis data) p(corr) values of the measured metabolites in models comparing day 1, 12:00 – 16:00 h with 00:00 – 04:00 h; 16:00 – 20:00 h with 04:00 – 08:00 h; 18:00 – 22:00 h with 06:00 – 10:00 h; 20:00 – 00:00 h with 08:00 – 12:00 h; and 22:00 – 02:00 h with 10:00 – 14:00 h.

| 12:00 - 16:00 h<br>vs<br>00:00 - 04:00 h |         | 16:00 - 20:00 h<br>vs<br>04:00 - 08:00 h |         | 18:00 - 22:00 h<br>vs<br>06:00 - 10:00 h |         | 20:00 - 00:00 h<br>vs<br>08:00 - 12:00 h |         | 22:00 - 02:00 h<br>vs<br>10:00 - 14:00 h |         |
|------------------------------------------|---------|------------------------------------------|---------|------------------------------------------|---------|------------------------------------------|---------|------------------------------------------|---------|
| Metabolite                               | p(corr) |
| Glu                                      | -0.676  | Glu                                      | -0.354  | PC ae C30:0                              | -0.368  | SM (OH) C16:1                            | -0.483  | alpha-AAA                                | -0.591  |
| C4                                       | -0.503  | PC ae C30:0                              | -0.329  | lysoPC a C26:0                           | -0.328  | PC ae C40:6                              | -0.424  | Glu                                      | -0.590  |
| C3                                       | -0.440  | C0                                       | -0.310  | lysoPC a C28:1                           | -0.312  | PC ae C30:0                              | -0.418  | C4                                       | -0.542  |
| Hexose                                   | -0.394  | C4                                       | -0.275  | lysoPC a C28:0                           | -0.306  | PC ae C34:1                              | -0.409  | C3                                       | -0.502  |
| PC aa C30:0                              | -0.385  | lysoPC a C28:0                           | -0.256  | ADMA                                     | -0.293  | PC ae C40:3                              | -0.407  | Val                                      | -0.456  |
| Asp                                      | -0.327  | PC aa C26:0                              | -0.239  | total DMA                                | -0.290  | C10:1                                    | -0.400  | C3-DC (C4-OH)                            | -0.451  |
| Val                                      | -0.301  | C5-OH (C3-DC-M)                          | -0.224  | C0                                       | -0.266  | SM (OH) C14:1                            | -0.398  | Ile                                      | -0.446  |
| alpha-AAA                                | -0.298  | lysoPC a C26:0                           | -0.211  | PC ae C44:3                              | -0.249  | PC ae C40:2                              | -0.391  | Sarcosine                                | -0.439  |
| Orn                                      | -0.273  | PC aa C30:0                              | -0.206  | C5-OH (C3-DC-M)                          | -0.232  | PC ae C40:5                              | -0.387  | Orn                                      | -0.431  |
| Ile                                      | -0.258  | lysoPC a C28:1                           | -0.197  | PC ae C30:2                              | -0.223  | PC ae C36:1                              | -0.386  | C5                                       | -0.409  |
| C3-OH                                    | -0.238  | Creatinine                               | -0.189  | lysoPC a C24:0                           | -0.219  | PC ae C34:0                              | -0.377  | Pro                                      | -0.384  |
| PC ae C30:0                              | -0.213  | ADMA                                     | -0.180  | PC aa C26:0                              | -0.217  | SM C20:2                                 | -0.373  | Leu                                      | -0.321  |
| PC aa C34:2                              | -0.197  | lysoPC a C24:0                           | -0.169  | C4                                       | -0.213  | C14:1                                    | -0.371  | Met                                      | -0.271  |
| Ser                                      | -0.189  | Gly                                      | -0.163  | PC ae C34:0                              | -0.206  | PC aa C28:1                              | -0.365  | Hexose                                   | -0.253  |
| C0                                       | -0.169  | C3                                       | -0.146  | lysoPC a C26:1                           | -0.193  | lysoPC a C26:0                           | -0.362  | Asn                                      | -0.241  |
| C5-OH (C3-DC-M)                          | -0.164  | lysoPC a C26:1                           | -0.141  | PC aa C24:0                              | -0.185  | PC ae C40:4                              | -0.361  | Phe                                      | -0.236  |
| Pro                                      | -0.163  | C10:1                                    | -0.134  | SM (OH) C16:1                            | -0.157  | PC ae C38:4                              | -0.356  | Tyr                                      | -0.214  |
| PC ae C34:0                              | -0.161  | PC ae C34:0                              | -0.132  | SM (OH) C24:1                            | -0.136  | C12:1                                    | -0.349  | lysoPC a C18:2                           | -0.212  |
| C5:1                                     | -0.161  | PC ae C30:1                              | -0.132  | PC ae C36:1                              | -0.133  | C18:1                                    | -0.348  | Ser                                      | -0.193  |
| PC aa C36:2                              | -0.160  | Hexose                                   | -0.131  | PC aa C34:4                              | -0.133  | C10                                      | -0.347  | ADMA                                     | -0.186  |
| PC ae C38:2                              | -0.155  | C4:1                                     | -0.119  | SM C20:2                                 | -0.129  | SM C16:0                                 | -0.347  | Cit                                      | -0.172  |
| C3-DC (C4-OH)                            | -0.145  | Lys                                      | -0.105  | Kynurenine                               | -0.127  | PC ae C44:3                              | -0.345  | Arg                                      | -0.161  |
| lysoPC a C14:0                           | -0.144  | PC ae C30:2                              | -0.101  | C10:1                                    | -0.125  | PC ae C42:5                              | -0.339  | Thr                                      | -0.158  |

|                |        |                |        |               |        |                |        |                 |        |
|----------------|--------|----------------|--------|---------------|--------|----------------|--------|-----------------|--------|
| Sarcosine      | -0.141 | PC aa C24:0    | -0.086 | PC ae C34:1   | -0.122 | lysoPC a C28:1 | -0.336 | Lys             | -0.153 |
| Cit            | -0.135 | C3-OH          | -0.053 | Creatinine    | -0.122 | C18:2          | -0.332 | PC aa C30:0     | -0.147 |
| C5             | -0.126 | Thr            | -0.051 | PC aa C40:1   | -0.121 | PC ae C32:1    | -0.330 | C5:1            | -0.142 |
| Leu            | -0.109 | PC aa C34:4    | -0.050 | PC aa C28:1   | -0.115 | PC ae C36:0    | -0.325 | C3-OH           | -0.116 |
| Lys            | -0.094 | C12:1          | -0.047 | SM (OH) C14:1 | -0.106 | PC aa C42:5    | -0.323 | His             | -0.108 |
| Asn            | -0.074 | total DMA      | -0.043 | PC ae C30:1   | -0.106 | C8             | -0.321 | PC ae C30:1     | -0.071 |
| C4:1           | -0.067 | C5:1           | -0.043 | PC ae C40:2   | -0.095 | PC ae C32:2    | -0.321 | C9              | -0.069 |
| PC aa C34:1    | -0.050 | PC aa C32:3    | -0.027 | Gly           | -0.094 | total DMA      | -0.318 | C6:1            | -0.063 |
| Met            | -0.042 | Kynurenine     | -0.022 | C3            | -0.094 | lysoPC a C28:0 | -0.314 | lysoPC a C14:0  | -0.058 |
| PC aa C34:3    | -0.036 | PC aa C32:1    | -0.013 | SM (OH) C22:1 | -0.090 | PC aa C40:1    | -0.311 | Creatinine      | -0.052 |
| Arg            | -0.034 | SM (OH) C24:1  | -0.003 | PC ae C42:1   | -0.086 | PC aa C38:0    | -0.310 | C5:1-DC         | -0.031 |
| C3:1           | -0.033 | Cit            | 0.000  | SDMA          | -0.085 | PC ae C38:3    | -0.310 | C12-DC          | -0.030 |
| C5-M-DC        | -0.023 | Ser            | 0.012  | PC ae C40:3   | -0.081 | PC ae C30:2    | -0.308 | Trp             | -0.027 |
| Thr            | -0.017 | PC ae C38:2    | 0.012  | PC ae C42:3   | -0.080 | PC ae C42:4    | -0.307 | C4:1            | -0.021 |
| His            | -0.013 | lysoPC a C14:0 | 0.015  | PC aa C32:3   | -0.075 | PC ae C38:6    | -0.306 | Gly             | -0.017 |
| PC aa C32:1    | -0.013 | C5             | 0.017  | PC ae C38:3   | -0.072 | SM C18:0       | -0.306 | Asp             | -0.016 |
| lysoPC a C18:2 | -0.010 | Val            | 0.028  | PC aa C42:0   | -0.071 | SM (OH) C22:1  | -0.306 | PC aa C34:2     | -0.010 |
| Tyr            | -0.002 | PC ae C36:2    | 0.030  | PC ae C42:2   | -0.070 | PC ae C38:5    | -0.303 | PC aa C26:0     | 0.014  |
| Creatinine     | 0.005  | PC aa C36:0    | 0.037  | PC aa C42:2   | -0.069 | SM (OH) C22:2  | -0.297 | PC aa C36:2     | 0.035  |
| ADMA           | 0.007  | PC ae C34:1    | 0.048  | PC ae C32:2   | -0.069 | PC aa C42:6    | -0.294 | lysoPC a C26:1  | 0.039  |
| Gly            | 0.031  | PC ae C36:1    | 0.055  | PC aa C32:1   | -0.067 | SM (OH) C24:1  | -0.294 | C0              | 0.053  |
| PC ae C30:1    | 0.032  | His            | 0.055  | SM C26:0      | -0.065 | PC aa C42:2    | -0.293 | C5-OH (C3-DC-M) | 0.054  |
| PC ae C36:2    | 0.036  | C3:1           | 0.058  | C5:1          | -0.059 | PC aa C42:0    | -0.293 | PC ae C38:2     | 0.084  |
| PC aa C32:3    | 0.045  | SM (OH) C22:1  | 0.059  | PC ae C36:2   | -0.059 | PC ae C44:5    | -0.287 | C14:2-OH        | 0.085  |
| PC aa C34:4    | 0.053  | PC aa C28:1    | 0.063  | PC aa C30:0   | -0.055 | PC aa C42:1    | -0.286 | PC aa C36:0     | 0.097  |
| PC aa C36:0    | 0.058  | Asp            | 0.071  | PC ae C40:6   | -0.052 | PC aa C36:1    | -0.266 | C5-DC (C6-OH)   | 0.104  |
| PC aa C26:0    | 0.073  | SM C26:0       | 0.078  | PC aa C36:0   | -0.050 | SM C16:1       | -0.266 | lysoPC a C24:0  | 0.122  |
| lysoPC a C28:0 | 0.086  | SM C20:2       | 0.078  | SM C24:0      | -0.048 | PC ae C36:2    | -0.264 | PC aa C24:0     | 0.125  |
| C5:1-DC        | 0.087  | PC ae C44:3    | 0.079  | PC aa C40:2   | -0.042 | C18            | -0.263 | lysoPC a C28:0  | 0.132  |
| C9             | 0.098  | SM C24:0       | 0.081  | PC ae C32:1   | -0.042 | PC ae C44:6    | -0.263 | PC aa C34:3     | 0.142  |
| lysoPC a C16:1 | 0.115  | C5-DC (C6-OH)  | 0.081  | PC ae C36:0   | -0.042 | PC aa C42:4    | -0.260 | C5-M-DC         | 0.144  |

|                |       |                |       |                |        |                |        |                |       |
|----------------|-------|----------------|-------|----------------|--------|----------------|--------|----------------|-------|
| PC aa C32:0    | 0.123 | PC aa C34:3    | 0.085 | C18            | -0.038 | C16:1          | -0.258 | lysoPC a C20:4 | 0.151 |
| Phe            | 0.131 | SM (OH) C16:1  | 0.091 | PC aa C36:6    | -0.037 | PC aa C40:2    | -0.257 | C3:1           | 0.151 |
| PC ae C36:1    | 0.133 | PC ae C38:3    | 0.091 | C3:1           | -0.037 | PC aa C40:3    | -0.256 | Serotonin      | 0.154 |
| lysoPC a C20:3 | 0.145 | PC aa C36:6    | 0.091 | Cit            | -0.035 | C14:2          | -0.256 | C6 (C4:1-DC)   | 0.164 |
| Kynurenine     | 0.161 | SM (OH) C14:1  | 0.096 | C12:1          | -0.032 | PC ae C44:4    | -0.256 | PC ae C40:1    | 0.172 |
| PC aa C36:3    | 0.169 | PC ae C42:3    | 0.096 | Thr            | -0.031 | SDMA           | -0.250 | C10:2          | 0.174 |
| PC ae C38:3    | 0.169 | SM C26:1       | 0.103 | SM C26:1       | -0.029 | C2             | -0.250 | C16-OH         | 0.184 |
| PC aa C36:1    | 0.182 | PC aa C34:2    | 0.104 | PC aa C42:1    | -0.027 | PC ae C36:4    | -0.248 | lysoPC a C18:1 | 0.190 |
| SM (OH) C24:1  | 0.184 | C5-M-DC        | 0.113 | Lys            | -0.024 | Kynurenine     | -0.247 | lysoPC a C20:3 | 0.198 |
| PC ae C34:1    | 0.188 | PC ae C42:1    | 0.119 | PC ae C38:2    | -0.024 | PC aa C40:6    | -0.246 | C16:2          | 0.204 |
| PC aa C36:5    | 0.194 | alpha-AAA      | 0.125 | PC aa C42:6    | -0.023 | PC ae C36:5    | -0.246 | Kynurenine     | 0.207 |
| Trp            | 0.195 | PC ae C32:2    | 0.128 | PC ae C44:4    | -0.019 | PC ae C42:2    | -0.243 | Ala            | 0.209 |
| lysoPC a C18:1 | 0.196 | C2             | 0.130 | C5             | -0.010 | SM C18:1       | -0.243 | PC aa C32:3    | 0.220 |
| PC aa C36:6    | 0.198 | PC ae C40:2    | 0.138 | C3-OH          | -0.008 | PC aa C40:4    | -0.236 | lysoPC a C26:0 | 0.223 |
| SM C24:0       | 0.201 | PC aa C36:2    | 0.138 | lysoPC a C17:0 | -0.004 | SM C24:1       | -0.236 | PC aa C34:1    | 0.231 |
| PC ae C36:0    | 0.215 | PC ae C36:0    | 0.140 | PC ae C40:4    | 0.002  | PC ae C42:3    | -0.233 | C16:1-OH       | 0.232 |
| C12-DC         | 0.217 | C16:1-OH       | 0.141 | PC ae C42:4    | 0.004  | PC aa C34:4    | -0.227 | lysoPC a C28:1 | 0.235 |
| SM (OH) C22:1  | 0.218 | PC ae C32:1    | 0.142 | PC aa C36:1    | 0.006  | lysoPC a C17:0 | -0.225 | Taurine        | 0.246 |
| C6 (C4:1-DC)   | 0.220 | C16:2          | 0.142 | PC ae C38:4    | 0.006  | PC aa C24:0    | -0.224 | lysoPC a C16:1 | 0.249 |
| lysoPC a C17:0 | 0.223 | SDMA           | 0.147 | PC aa C42:4    | 0.007  | SM C26:1       | -0.222 | Gln            | 0.254 |
| PC aa C36:4    | 0.232 | lysoPC a C17:0 | 0.150 | PC ae C42:5    | 0.008  | lysoPC a C24:0 | -0.218 | PC aa C36:4    | 0.256 |
| lysoPC a C26:0 | 0.240 | Arg            | 0.150 | PC ae C44:6    | 0.011  | C0             | -0.215 | PC aa C32:0    | 0.266 |
| Serotonin      | 0.243 | lysoPC a C16:1 | 0.154 | SM C16:0       | 0.012  | PC ae C42:1    | -0.213 | PC aa C40:2    | 0.267 |
| SM C26:1       | 0.244 | C14:1          | 0.154 | Hexose         | 0.017  | PC ae C36:3    | -0.212 | PC aa C36:5    | 0.267 |
| C10:2          | 0.245 | Met            | 0.154 | SM C18:0       | 0.019  | PC aa C38:6    | -0.211 | SM C24:0       | 0.271 |
| PC ae C40:1    | 0.253 | SM C18:1       | 0.158 | PC ae C40:5    | 0.020  | PC aa C40:5    | -0.210 | PC ae C42:1    | 0.272 |
| SM C26:0       | 0.257 | PC ae C42:2    | 0.160 | SM (OH) C22:2  | 0.020  | SM C26:0       | -0.210 | SDMA           | 0.281 |
| lysoPC a C26:1 | 0.257 | PC aa C36:1    | 0.161 | Glu            | 0.022  | PC aa C36:6    | -0.208 | C14            | 0.281 |
| PC ae C34:2    | 0.257 | PC ae C40:1    | 0.161 | PC ae C40:1    | 0.025  | PC ae C42:0    | -0.207 | SM C26:0       | 0.283 |
| PC aa C24:0    | 0.273 | Gln            | 0.166 | C14:1          | 0.030  | PC aa C32:1    | -0.204 | C10:1          | 0.290 |
| SM C18:1       | 0.274 | lysoPC a C18:1 | 0.167 | PC ae C44:5    | 0.031  | SM C24:0       | -0.201 | PC aa C34:4    | 0.293 |
| lysoPC a C20:4 | 0.276 | SM (OH) C22:2  | 0.167 | Ala            | 0.031  | PC aa C38:3    | -0.197 | PC ae C30:2    | 0.297 |

|                |       |                |       |                |       |                 |        |                |       |
|----------------|-------|----------------|-------|----------------|-------|-----------------|--------|----------------|-------|
| lysoPC a C24:0 | 0.276 | lysoPC a C20:3 | 0.169 | C5-DC (C6-OH)  | 0.033 | C7-DC           | -0.189 | C18:1-OH       | 0.312 |
| PC aa C38:3    | 0.276 | PC aa C40:1    | 0.177 | PC aa C38:0    | 0.034 | PC ae C34:2     | -0.182 | PC aa C32:1    | 0.312 |
| PC ae C38:0    | 0.279 | SM C16:1       | 0.179 | SM C16:1       | 0.035 | PC aa C38:5     | -0.179 | PC aa C38:4    | 0.317 |
| PC aa C28:1    | 0.279 | PC aa C34:1    | 0.180 | SM C24:1       | 0.036 | PC aa C32:3     | -0.171 | PC ae C42:3    | 0.325 |
| SM C24:1       | 0.283 | SM C18:0       | 0.183 | lysoPC a C14:0 | 0.036 | C5-OH (C3-DC-M) | -0.170 | PC aa C36:3    | 0.329 |
| PC ae C36:3    | 0.289 | Asn            | 0.185 | SM C18:1       | 0.038 | lysoPC a C26:1  | -0.163 | PC ae C42:2    | 0.329 |
| C18:1-OH       | 0.289 | Orn            | 0.187 | PC ae C42:0    | 0.043 | PC aa C26:0     | -0.162 | PC ae C38:0    | 0.330 |
| C16:2          | 0.292 | PC ae C40:3    | 0.190 | PC aa C40:3    | 0.059 | PC ae C34:3     | -0.160 | C12:1          | 0.330 |
| C16:2-OH       | 0.304 | C16-OH         | 0.190 | C5-M-DC        | 0.063 | PC ae C38:0     | -0.133 | PC ae C44:3    | 0.338 |
| SM C16:1       | 0.304 | SM C24:1       | 0.195 | PC ae C36:3    | 0.067 | lysoPC a C16:0  | -0.131 | PC ae C44:6    | 0.339 |
| SM (OH) C22:2  | 0.305 | C18:1-OH       | 0.197 | PC aa C42:5    | 0.070 | lysoPC a C18:0  | -0.129 | C14:1-OH       | 0.344 |
| C6:1           | 0.309 | PC ae C44:4    | 0.200 | PC aa C38:3    | 0.071 | C12             | -0.112 | SM C26:1       | 0.344 |
| PC ae C32:1    | 0.309 | PC aa C42:0    | 0.200 | PC ae C38:6    | 0.072 | C3:1            | -0.110 | PC aa C36:6    | 0.347 |
| PC ae C40:2    | 0.310 | C10:2          | 0.206 | C4:1           | 0.076 | PC aa C36:5     | -0.105 | SM (OH) C24:1  | 0.351 |
| lysoPC a C28:1 | 0.320 | Leu            | 0.206 | Gln            | 0.077 | PC aa C36:3     | -0.100 | PC aa C42:2    | 0.360 |
| PC ae C30:2    | 0.325 | C18:1          | 0.211 | PC aa C40:4    | 0.081 | PC aa C38:4     | -0.095 | PC ae C44:4    | 0.362 |
| SM (OH) C14:1  | 0.326 | PC aa C42:2    | 0.212 | PC ae C36:5    | 0.085 | PC aa C36:0     | -0.082 | PC aa C42:0    | 0.369 |
| SM C20:2       | 0.326 | SM C16:0       | 0.215 | His            | 0.088 | C18:1-OH        | -0.077 | PC aa C42:1    | 0.372 |
| SM (OH) C16:1  | 0.333 | PC ae C38:0    | 0.216 | PC aa C40:6    | 0.089 | PC ae C40:1     | -0.075 | PC aa C40:1    | 0.372 |
| SM C18:0       | 0.335 | PC ae C34:2    | 0.218 | PC ae C38:0    | 0.090 | PC aa C32:0     | -0.066 | total DMA      | 0.375 |
| C14:2-OH       | 0.337 | lysoPC a C20:4 | 0.223 | C18:1          | 0.090 | PC ae C30:1     | -0.053 | PC aa C38:5    | 0.375 |
| C16-OH         | 0.342 | PC aa C36:5    | 0.224 | C2             | 0.093 | PC ae C38:2     | -0.043 | lysoPC a C16:0 | 0.382 |
| Gln            | 0.346 | Ile            | 0.226 | PC aa C34:3    | 0.095 | lysoPC a C16:1  | -0.037 | lysoPC a C18:0 | 0.383 |
| PC ae C32:2    | 0.350 | lysoPC a C18:2 | 0.229 | PC ae C34:2    | 0.095 | Gly             | -0.036 | PC ae C42:0    | 0.388 |
| PC ae C42:2    | 0.354 | PC aa C38:3    | 0.229 | PC ae C38:5    | 0.096 | Gln             | -0.035 | PC ae C34:2    | 0.390 |
| total DMA      | 0.365 | PC ae C36:3    | 0.231 | C16-OH         | 0.107 | C16             | -0.027 | PC aa C42:6    | 0.391 |
| PC ae C42:1    | 0.366 | PC aa C36:3    | 0.234 | PC ae C36:4    | 0.109 | Creatinine      | -0.024 | PC ae C44:5    | 0.394 |
| PC ae C40:3    | 0.367 | Sarcosine      | 0.237 | PC aa C40:5    | 0.113 | C14:1-OH        | -0.022 | SM C24:1       | 0.397 |
| SDMA           | 0.367 | PC aa C42:1    | 0.238 | C18:1-OH       | 0.127 | PC aa C34:3     | -0.021 | C16:2-OH       | 0.401 |
| PC ae C42:3    | 0.370 | PC aa C42:6    | 0.240 | lysoPC a C16:1 | 0.131 | C3-OH           | -0.017 | PC ae C42:4    | 0.404 |
| PC aa C40:4    | 0.370 | PC ae C40:6    | 0.248 | PC aa C38:5    | 0.131 | PC aa C34:1     | -0.017 | PC aa C38:3    | 0.407 |



|                |       |                |       |                |       |                |        |                |       |
|----------------|-------|----------------|-------|----------------|-------|----------------|--------|----------------|-------|
| SM C16:0       | 0.372 | PC ae C38:4    | 0.252 | Serotonin      | 0.133 | C4:1           | -0.016 | SM C18:1       | 0.412 |
| PC aa C38:5    | 0.377 | C18            | 0.258 | PC aa C36:5    | 0.136 | PC aa C36:4    | -0.005 | PC aa C36:1    | 0.413 |
| lysoPC a C18:0 | 0.377 | C16:1          | 0.262 | PC aa C36:3    | 0.142 | Serotonin      | 0.009  | SM (OH) C22:1  | 0.418 |
| lysoPC a C16:0 | 0.384 | PC aa C40:2    | 0.264 | Met            | 0.145 | Asp            | 0.016  | PC aa C40:6    | 0.419 |
| PC aa C38:4    | 0.387 | C6 (C4:1-DC)   | 0.266 | PC aa C34:1    | 0.148 | C10:2          | 0.018  | PC ae C30:0    | 0.423 |
| C18            | 0.397 | Trp            | 0.276 | Trp            | 0.157 | C16:2          | 0.028  | PC ae C36:2    | 0.425 |
| PC aa C42:6    | 0.398 | PC ae C44:6    | 0.276 | lysoPC a C18:0 | 0.162 | C16:2-OH       | 0.036  | PC aa C40:3    | 0.429 |
| PC aa C40:5    | 0.400 | PC ae C42:4    | 0.282 | PC aa C38:6    | 0.164 | PC aa C30:0    | 0.057  | PC aa C38:6    | 0.430 |
| PC ae C44:3    | 0.403 | PC aa C40:4    | 0.288 | PC aa C38:4    | 0.165 | ADMA           | 0.057  | PC ae C34:3    | 0.430 |
| PC ae C38:4    | 0.410 | PC aa C32:0    | 0.288 | lysoPC a C16:0 | 0.175 | lysoPC a C18:1 | 0.063  | PC aa C40:5    | 0.432 |
| Ala            | 0.411 | PC ae C44:5    | 0.291 | C12-DC         | 0.179 | C5-DC (C6-OH)  | 0.064  | SM C16:1       | 0.434 |
| PC aa C40:3    | 0.422 | PC ae C40:4    | 0.299 | PC aa C36:2    | 0.181 | Taurine        | 0.066  | PC aa C40:4    | 0.434 |
| C5-DC (C6-OH)  | 0.424 | C6:1           | 0.302 | Arg            | 0.182 | C4             | 0.075  | PC aa C42:4    | 0.439 |
| PC ae C34:3    | 0.434 | PC aa C38:0    | 0.304 | PC ae C34:3    | 0.192 | C5:1           | 0.088  | PC ae C36:5    | 0.443 |
| PC ae C36:4    | 0.443 | PC aa C40:5    | 0.308 | Ser            | 0.196 | lysoPC a C14:0 | 0.092  | PC ae C36:3    | 0.445 |
| C16:1-OH       | 0.458 | C3-DC (C4-OH)  | 0.312 | PC aa C34:2    | 0.201 | lysoPC a C20:4 | 0.094  | C18            | 0.449 |
| PC aa C40:6    | 0.461 | PC aa C38:5    | 0.316 | C18:2          | 0.202 | PC aa C36:2    | 0.105  | C12            | 0.451 |
| PC aa C42:2    | 0.462 | PC aa C40:6    | 0.320 | Asp            | 0.207 | C16-OH         | 0.106  | PC aa C28:1    | 0.458 |
| PC aa C40:2    | 0.462 | PC ae C42:5    | 0.320 | C16:2          | 0.226 | Ala            | 0.110  | PC ae C32:2    | 0.459 |
| PC aa C42:1    | 0.464 | C7-DC          | 0.321 | Taurine        | 0.229 | C5-M-DC        | 0.114  | PC ae C42:5    | 0.459 |
| PC aa C40:1    | 0.466 | PC ae C36:4    | 0.322 | lysoPC a C18:1 | 0.232 | Cit            | 0.127  | lysoPC a C17:0 | 0.461 |
| PC ae C44:4    | 0.467 | PC aa C40:3    | 0.323 | PC aa C32:0    | 0.235 | lysoPC a C20:3 | 0.136  | SM (OH) C22:2  | 0.475 |
| PC aa C38:6    | 0.475 | C14:1-OH       | 0.323 | C16:1          | 0.236 | C6 (C4:1-DC)   | 0.137  | C14:2          | 0.476 |
| PC ae C40:4    | 0.476 | PC ae C42:0    | 0.325 | PC aa C36:4    | 0.241 | C5             | 0.138  | PC aa C38:0    | 0.479 |
| PC ae C40:6    | 0.486 | lysoPC a C18:0 | 0.325 | alpha-AAA      | 0.249 | PC aa C34:2    | 0.143  | C7-DC          | 0.480 |
| PC ae C38:6    | 0.488 | C14:2-OH       | 0.326 | C10:2          | 0.261 | C16:1-OH       | 0.144  | PC ae C32:1    | 0.485 |
| PC ae C36:5    | 0.494 | C12-DC         | 0.326 | Asn            | 0.268 | C9             | 0.158  | PC ae C34:0    | 0.492 |
| PC ae C42:0    | 0.495 | Ala            | 0.327 | Val            | 0.275 | C3             | 0.198  | PC ae C36:4    | 0.494 |
| PC aa C42:4    | 0.501 | PC ae C38:6    | 0.329 | Sarcosine      | 0.279 | C6:1           | 0.218  | PC ae C36:0    | 0.496 |
| PC aa C38:0    | 0.505 | PC aa C36:4    | 0.336 | C8             | 0.282 | Trp            | 0.219  | SM C18:0       | 0.505 |
| PC ae C38:5    | 0.513 | PC ae C40:5    | 0.338 | C7-DC          | 0.287 | C14            | 0.221  | PC ae C38:3    | 0.520 |
| PC ae C42:4    | 0.528 | PC aa C38:4    | 0.341 | lysoPC a C20:3 | 0.294 | Thr            | 0.227  | PC ae C40:4    | 0.528 |

|             |       |                |       |                |       |                |       |               |       |
|-------------|-------|----------------|-------|----------------|-------|----------------|-------|---------------|-------|
| C10:1       | 0.529 | PC ae C36:5    | 0.343 | lysoPC a C20:4 | 0.302 | Lys            | 0.229 | C16           | 0.534 |
| PC aa C42:5 | 0.543 | lysoPC a C16:0 | 0.344 | C14:2          | 0.308 | His            | 0.243 | PC ae C38:6   | 0.538 |
| PC ae C40:5 | 0.543 | PC aa C42:4    | 0.349 | C16:1-OH       | 0.312 | C14:2-OH       | 0.244 | C14:1         | 0.543 |
| Taurine     | 0.548 | PC ae C38:5    | 0.361 | C14:1-OH       | 0.327 | C12-DC         | 0.251 | PC ae C38:5   | 0.544 |
| PC aa C42:0 | 0.549 | PC aa C38:6    | 0.365 | Orn            | 0.330 | C5:1-DC        | 0.282 | SM (OH) C14:1 | 0.549 |
| PC ae C44:6 | 0.560 | C16:2-OH       | 0.370 | C10            | 0.334 | Hexose         | 0.311 | SM C20:2      | 0.550 |
| PC ae C44:5 | 0.566 | C8             | 0.375 | C6:1           | 0.338 | Arg            | 0.374 | C8            | 0.552 |
| C14:1       | 0.567 | Serotonin      | 0.376 | Tyr            | 0.370 | Orn            | 0.378 | PC aa C42:5   | 0.553 |
| C2          | 0.569 | PC aa C42:5    | 0.377 | C14:2-OH       | 0.383 | lysoPC a C18:2 | 0.421 | PC ae C40:2   | 0.554 |
| C12:1       | 0.571 | C14:2          | 0.380 | C6 (C4:1-DC)   | 0.385 | Met            | 0.455 | C2            | 0.558 |
| C14         | 0.588 | PC ae C34:3    | 0.387 | Leu            | 0.388 | alpha-AAA      | 0.468 | SM C16:0      | 0.561 |
| PC ae C42:5 | 0.597 | C18:2          | 0.387 | C16:2-OH       | 0.405 | Tyr            | 0.471 | PC ae C36:1   | 0.571 |
| C8          | 0.615 | Tyr            | 0.398 | C9             | 0.405 | Ser            | 0.494 | PC ae C38:4   | 0.584 |
| C16:1       | 0.625 | C9             | 0.412 | Pro            | 0.413 | Sarcosine      | 0.521 | PC ae C40:6   | 0.591 |
| C14:1-OH    | 0.625 | C5:1-DC        | 0.424 | C16            | 0.441 | Phe            | 0.536 | C16:1         | 0.601 |
| C14:2       | 0.627 | Pro            | 0.455 | Phe            | 0.445 | Asn            | 0.578 | C10           | 0.601 |
| C7-DC       | 0.659 | C10            | 0.467 | lysoPC a C18:2 | 0.449 | Pro            | 0.590 | PC ae C40:5   | 0.601 |
| C18:1       | 0.664 | Phe            | 0.493 | C5:1-DC        | 0.455 | C3-DC (C4-OH)  | 0.600 | C18:2         | 0.606 |
| C16         | 0.670 | C16            | 0.497 | Ile            | 0.457 | Val            | 0.603 | PC ae C34:1   | 0.608 |
| C10         | 0.684 | Taurine        | 0.503 | C3-DC (C4-OH)  | 0.458 | Leu            | 0.628 | PC ae C40:3   | 0.616 |
| C12         | 0.687 | C12            | 0.532 | C12            | 0.494 | Glu            | 0.631 | SM (OH) C16:1 | 0.647 |
| C18:2       | 0.773 | C14            | 0.612 | C14            | 0.627 | Ile            | 0.723 | C18:1         | 0.649 |

Table S4: Number of metabolites differing significantly ( $p < 0.05$  and  $q < 0.05$ ) between the different time periods, corresponding times of day (defined in Table S1), and the interaction term (time period\*time of day).

| <b>Time period</b> | <b>Factor</b> | <b>Number of metabolites</b> |
|--------------------|---------------|------------------------------|
| 1                  | Time period   | 7                            |
|                    | Time of day   | 159                          |
|                    | Interaction   | 45                           |
| 2                  | Time period   | 0                            |
|                    | Time of day   | 145                          |
|                    | Interaction   | 96                           |
| 3                  | Time period   | 41                           |
|                    | Time of day   | 59                           |
|                    | Interaction   | 4                            |
| 4                  | Time period   | 21                           |
|                    | Time of day   | 121                          |
|                    | Interaction   | 3                            |

Table S5: Percent increase in concentrations (mean  $\pm$  SEM) during sleep deprivation of the 41 metabolites that had significantly higher levels ( $p < 0.05$ ,  $q < 0.05$ ) during sleep deprivation compared with during sleep (00:00 – 06:00 h).

| Metabolite                            | % increase<br>mean $\pm$ SEM |
|---------------------------------------|------------------------------|
| Serotonin                             | 43.6 $\pm$ 20.1              |
| PC ae C34:0                           | 28.6 $\pm$ 7.3               |
| Nonacylcarnitine (C9)                 | 28.1 $\pm$ 8.7               |
| PC ae C30:0                           | 25.4 $\pm$ 5.8               |
| PC aa C30:0                           | 25.1 $\pm$ 7.2               |
| PC aa C32:1                           | 22.2 $\pm$ 6.4               |
| lysoPC a C17:0                        | 22.0 $\pm$ 6.4               |
| PC ae C36:1                           | 21.8 $\pm$ 6.0               |
| Pimelylcarnitine (C7-DC )             | 21.5 $\pm$ 9.1               |
| Taurine                               | 21.0 $\pm$ 5.7               |
| PC ae C38:3                           | 20.8 $\pm$ 6.3               |
| PC ae C34:1                           | 20.7 $\pm$ 6.5               |
| PC ae C38:2                           | 20.2 $\pm$ 10.6              |
| Tryptophan                            | 19.6 $\pm$ 6.0               |
| Decanoylcarnitine (C10 )              | 19.2 $\pm$ 5.4               |
| PC ae C36:2                           | 18.5 $\pm$ 6.2               |
| PC aa C34:4                           | 17.1 $\pm$ 5.3               |
| lysoPC a C16:1                        | 17.1 $\pm$ 5.3               |
| PC ae C40:2                           | 16.6 $\pm$ 5.7               |
| Dodecanoylcarnitine (C12)             | 16.6 $\pm$ 5.1               |
| PC ae C36:0                           | 16.2 $\pm$ 6.7               |
| PC ae C32:1                           | 15.9 $\pm$ 5.8               |
| SM (OH) C16:1                         | 15.9 $\pm$ 5.0               |
| Valerylcarnitine (C5)                 | 15.5 $\pm$ 5.1               |
| PC aa C36:6                           | 15.1 $\pm$ 5.8               |
| Propionylcarnitine (C3)               | 14.9 $\pm$ 5.4               |
| PC aa C32:0                           | 14.6 $\pm$ 6.3               |
| PC ae C38:4                           | 13.5 $\pm$ 5.3               |
| PC aa C28:1                           | 13.0 $\pm$ 5.3               |
| SM (OH) C14:1                         | 12.3 $\pm$ 4.4               |
| SM C20:2                              | 12.3 $\pm$ 4.8               |
| PC ae C40:6                           | 12.2 $\pm$ 5.3               |
| PC ae C40:3                           | 12.2 $\pm$ 4.7               |
| PC aa C32:3                           | 12.1 $\pm$ 5.0               |
| PC ae C40:5                           | 12.0 $\pm$ 5.1               |
| Octanoylcarnitine (C8)                | 11.9 $\pm$ 3.9               |
| lysoPC a C18:1                        | 11.0 $\pm$ 4.7               |
| lysoPC a C14:0                        | 10.9 $\pm$ 3.2               |
| SM (OH) C22:2                         | 10.7 $\pm$ 4.1               |
| Tetradecanoylcarnitine (C14)          | 10.4 $\pm$ 4.1               |
| Hydroxyhexadecanoylcarnitine (C16-OH) | 6.7 $\pm$ 3.1                |

Table S6: Targeted metabolic profiling data: cosinor analysis (amplitude, acrophase) for each measured metabolite on day 1 and day 2 and the change in amplitude and phase between day 1 and day 2.

| Metabolite                          | Day 1             |                         |         | Day 2             |                         |         | % change in amplitude | Phase shift $\Delta\phi$ (dec. h) |     |       |
|-------------------------------------|-------------------|-------------------------|---------|-------------------|-------------------------|---------|-----------------------|-----------------------------------|-----|-------|
|                                     | Amplitude z-score | Acrophase time (dec. h) | p-value | Amplitude z-score | Acrophase time (dec. h) | p-value |                       |                                   |     |       |
| <i>Amino acids</i>                  |                   |                         |         |                   |                         |         |                       |                                   |     |       |
| Alanine                             |                   |                         | 0.342   |                   |                         | 0.241   |                       |                                   |     |       |
| Arginine                            |                   |                         | 0.262   |                   |                         | 0.082   |                       |                                   |     |       |
| Asparagine                          |                   |                         | 0.100   |                   |                         | 0.073   |                       |                                   |     |       |
| Aspartate                           |                   |                         | 0.100   | 0.38              | 23.51                   | 0.009   | **                    |                                   |     |       |
| Citrulline                          |                   |                         | 0.643   |                   |                         | 0.731   |                       |                                   |     |       |
| Glutamate                           | 1.00              | 01.45                   | <0.001  | ***               | 0.78                    | 00.56   | 0.007                 | **                                | -22 | 0.89  |
| Glutamine                           |                   |                         | 0.169   |                   |                         | 0.117   |                       |                                   |     |       |
| Glycine                             |                   |                         | 0.347   |                   |                         | 0.579   |                       |                                   |     |       |
| Histidine                           |                   |                         | 0.360   |                   |                         | 0.127   |                       |                                   |     |       |
| Isoleucine                          | 0.71              | 22.75                   | 0.042   | *                 | 0.91                    | 22.48   | 0.021                 | *                                 | 29  | 0.27  |
| Leucine                             |                   |                         | 0.128   |                   |                         | 0.070   |                       |                                   |     |       |
| Lysine                              |                   |                         | 0.371   |                   |                         | 0.205   |                       |                                   |     |       |
| Methionine                          |                   |                         | 0.245   |                   |                         | 0.116   |                       |                                   |     |       |
| Ornithine                           | 0.49              | 22.91                   | 0.013   | *                 | 0.75                    | 22.62   | 0.012                 | *                                 | 53  | 0.29  |
| Phenylalanine                       |                   |                         | 0.061   |                   |                         | 0.069   |                       |                                   |     |       |
| Proline                             | 0.72              | 21.28                   | 0.019   | *                 | 0.94                    | 21.05   | 0.011                 | *                                 | 30  | 0.23  |
| Serine                              |                   |                         | 0.094   |                   |                         | 0.151   |                       |                                   |     |       |
| Threonine                           |                   |                         | 0.386   |                   |                         | 0.132   |                       |                                   |     |       |
| <b>Tryptophan</b>                   |                   |                         | 0.272   |                   |                         | 0.210   |                       |                                   |     |       |
| Tyrosine                            |                   |                         | 0.092   |                   | 0.74                    | 21.71   | 0.045                 | *                                 |     |       |
| Valine                              | 0.62              | 23.55                   | 0.037   | *                 | 0.85                    | 23.06   | 0.016                 | *                                 | 38  | 0.49  |
| <i>Biogenic amines</i>              |                   |                         |         |                   |                         |         |                       |                                   |     |       |
| Alpha-Amino adipic acid (alpha-AAA) | 0.73              | 23.01                   | 0.001   | **                | 0.84                    | 23.06   | 0.004                 | **                                | 15  | -0.05 |
| Asymmetric dimethylarginine (ADMA)  |                   |                         | 0.337   |                   |                         | 0.094   |                       |                                   |     |       |
| Symmetrical Dimethylarginine (SDMA) | 0.54              | 12.72                   | 0.001   | ***               | 0.52                    | 13.46   | <0.001                | ***                               | -3  | -0.74 |
| Total Dimethylarginine (DMA)        | 0.39              | 11.23                   | 0.033   | *                 |                         |         | 0.079                 |                                   |     |       |
| Creatinine                          |                   |                         | 0.530   |                   |                         | 0.427   |                       |                                   |     |       |
| Kynurenine                          | 0.55              | 11.25                   | 0.015   | *                 | 0.61                    | 09.29   | 0.002                 | **                                | 10  | 1.96  |

|                                            |      |       |        |     |      |       |       |     |     |       |
|--------------------------------------------|------|-------|--------|-----|------|-------|-------|-----|-----|-------|
| Sarcosine                                  | 0.78 | 21.97 | 0.004  | **  | 0.76 | 22.41 | 0.013 | *   | -2  | -0.45 |
| <b>Serotonin</b>                           |      |       | 0.117  |     |      |       | 0.533 |     |     |       |
| <b>Taurine</b>                             | 0.66 | 15.83 | 0.004  | **  |      |       | 0.216 |     |     |       |
| <i>Hexoses</i>                             |      |       |        |     |      |       |       |     |     |       |
| Hexose                                     | 0.36 | 01.45 | 0.027  | *   |      |       | 0.431 |     |     |       |
| <i>Acylcarnitines</i>                      |      |       |        |     |      |       |       |     |     |       |
| Carnitine (C0)                             | 0.45 | 06.75 | 0.025  | *   | 0.38 | 06.49 | 0.048 | *   | -16 | 0.26  |
| Acetylcarnitine (C2)                       | 0.84 | 13.14 | 0.007  | **  |      |       | 0.196 |     |     |       |
| <b>Propionylcarnitine (C3)</b>             |      |       | 0.058  |     | 0.93 | 01.28 | 0.005 | **  |     |       |
| Propenoylcarnitine (C3:1)                  | 0.78 | 20.96 | 0.043  | *   | 0.54 | 22.55 | 0.050 | *   | -31 | -1.59 |
| Hydroxybutyrylcarnitine (C3-DC (C4-OH))    |      |       | 0.892  |     |      |       | 0.685 |     |     |       |
| Hydroxypropionylcarnitine (C3-OH)          |      |       | 0.700  |     |      |       | 0.434 |     |     |       |
| Butyrylcarnitine (C4)                      | 0.75 | 02.80 | 0.003  | **  | 0.95 | 02.45 | 0.001 | *** | 26  | 0.35  |
| Butenylcarnitine (C4:1)                    |      |       | 0.428  |     |      |       | 0.942 |     |     |       |
| <b>Valerylcarnitine (C5)</b>               |      |       | 0.318  |     | 0.70 | 01.04 | 0.004 | **  |     |       |
| Tiglylcarnitine (C5:1)                     |      |       | 0.253  |     |      |       | 0.898 |     |     |       |
| Glutaconylcarnitine (C5:1-DC)              |      |       | 0.674  |     |      |       | 0.293 |     |     |       |
| Hydroxyhexanoylcarnitine (C5-DC (C6-OH))   |      |       | 0.174  |     |      |       | 0.745 |     |     |       |
| Methylglutaryl carnitine (C5-M-DC)         |      |       | 0.387  |     |      |       | 0.697 |     |     |       |
| Hydroxyvalerylcarnitine (C5-OH (C3-DC-M))  | 0.47 | 18.17 | 0.003  | **  |      |       | 0.259 |     |     |       |
| Hexanoylcarnitine (C6 (C4:1-DC))           |      |       | 0.052  |     |      |       | 0.294 |     |     |       |
| Hexenoylcarnitine (C6:1)                   |      |       | 0.145  |     |      |       | 0.229 |     |     |       |
| <b>Pimelylcarnitine (C7-DC )</b>           | 1.05 | 14.38 | 0.005  | **  |      |       | 0.059 |     |     |       |
| <b>Octanoylcarnitine (C8)</b>              | 1.00 | 13.99 | 0.002  | **  |      |       | 0.073 |     |     |       |
| <b>Nonaylcarnitine (C9)</b>                | 0.56 | 18.02 | 0.012  | *   |      |       | 0.068 |     |     |       |
| <b>Decanoylcarnitine (C10 )</b>            | 1.06 | 14.21 | 0.001  | *** |      |       | 0.063 |     |     |       |
| Decenoylcarnitine (C10:1)                  | 0.72 | 12.16 | 0.019  | *   |      |       | 0.479 |     |     |       |
| Decadienylcarnitine (C10:2)                | 0.41 | 14.81 | 0.030  | *   |      |       | 0.066 |     |     |       |
| <b>Dodecanoylcarnitine (C12)</b>           | 1.08 | 15.24 | 0.001  | *** |      |       | 0.076 |     |     |       |
| Dodecenoylcarnitine (C12:1)                |      |       | 0.171  |     |      |       | 0.456 |     |     |       |
| Dodecanedioylcarnitine (C12-DC)            | 0.74 | 12.49 | 0.023  | *   |      |       | 0.511 |     |     |       |
| <b>Tetradecanoylcarnitine (C14)</b>        | 0.82 | 16.31 | <0.001 | *** | 0.71 | 17.91 | 0.016 | *   | -14 | -1.60 |
| Tetradecenoylcarnitine (C14:1)             | 0.91 | 13.24 | 0.001  | *** |      |       | 0.054 |     |     |       |
| Hydroxytetradecenoylcarnitine C14:1-OH     | 0.70 | 14.66 | 0.007  | **  |      |       | 0.120 |     |     |       |
| Tetradecadienylcarnitine (C14:2)           | 0.88 | 14.02 | 0.004  | **  | 0.66 | 12.81 | 0.041 | *   | -25 | 1.21  |
| Hydroxytetradecadienylcarnitine (C14:2-OH) | 0.45 | 17.60 | 0.005  | **  |      |       | 0.128 |     |     |       |
| Hexadecanoylcarnitine (C16)                | 0.93 | 15.24 | <0.001 | *** | 0.74 | 15.73 | 0.007 | **  | -21 | -0.48 |
| Hexadecenoylcarnitine (C16:1)              |      |       | 0.104  |     |      |       | 0.198 |     |     |       |
| Hydroxyhexadecenoylcarnitine (C16:1-OH)    | 0.83 | 13.68 | 0.008  | **  | 0.71 | 13.26 | 0.021 | *   | -15 | 0.42  |

|                                                  |      |       |        |     |      |       |        |     |     |       |
|--------------------------------------------------|------|-------|--------|-----|------|-------|--------|-----|-----|-------|
| Hexadecadienylcarnitine (C16:2)                  |      |       | 0.082  |     |      |       | 0.068  |     |     |       |
| <b>Hydroxyhexadecadienylcarnitine (C16:2-OH)</b> | 0.51 | 13.65 | 0.017  | *   | 0.53 | 12.97 | 0.023  | *   | 4   | 0.68  |
| Hydroxyhexadecanoylcarnitine (C16-OH)            | 0.51 | 16.19 | 0.035  | *   | 0.53 | 14.41 | 0.036  | *   | 4   | 1.78  |
| Octadecanoylcarnitine (C18)                      | 0.60 | 13.66 | 0.003  | **  |      |       | 0.051  |     |     |       |
| Octadecenoylcarnitine (C18:1)                    | 0.92 | 13.20 | 0.001  | **  | 0.80 | 12.89 | 0.015  | *   | -13 | 0.31  |
| Hydroxyoctadecenoylcarnitine (C18:1-OH)          |      |       | 0.073  |     |      |       | 0.292  |     |     |       |
| Octadecadienylcarnitine (C18:2)                  | 1.01 | 13.83 | <0.001 | *** | 0.87 | 13.25 | 0.002  | **  | -14 | 0.58  |
| <i>Glycerophospholipids</i>                      |      |       |        |     |      |       |        |     |     |       |
| <b>lysoPC a C14:0</b>                            |      |       | 0.333  |     | 0.54 | 00.28 | 0.005  | **  |     |       |
| lysoPC a C16:0                                   | 0.79 | 15.08 | 0.001  | *** | 0.67 | 16.20 | 0.001  | **  | -15 | -1.12 |
| <b>lysoPC a C16:1</b>                            |      |       | 0.169  |     |      |       | 0.203  |     |     |       |
| <b>lysoPC a C17:0</b>                            | 0.56 | 13.42 | 0.042  | *   | 0.52 | 16.02 | 0.002  | **  | -6  | -2.60 |
| lysoPC a C18:0                                   | 0.79 | 14.94 | <0.001 | *** | 0.69 | 16.45 | 0.001  | *** | -13 | -1.51 |
| <b>lysoPC a C18:1</b>                            |      |       | 0.148  |     |      |       | 0.098  |     |     |       |
| lysoPC a C18:2                                   | 0.55 | 20.81 | 0.022  | *   | 0.68 | 21.82 | 0.001  | **  | 23  | -1.01 |
| lysoPC a C20:3                                   |      |       | 0.150  |     |      |       | 0.098  |     |     |       |
| lysoPC a C20:4                                   |      |       | 0.051  |     |      |       | 0.217  |     |     |       |
| lysoPC a C24:0                                   | 0.44 | 11.22 | 0.040  | *   |      |       | 0.085  |     |     |       |
| lysoPC a C26:0                                   | 0.50 | 10.43 | 0.018  | *   |      |       | 0.179  |     |     |       |
| lysoPC a C26:1                                   |      |       | 0.059  |     |      |       | 0.445  |     |     |       |
| lysoPC a C28:0                                   |      |       | 0.062  |     |      |       | 0.301  |     |     |       |
| lysoPC a C28:1                                   | 0.55 | 10.91 | 0.014  | *   |      |       | 0.344  |     |     |       |
| PC aa C24:0                                      | 0.36 | 11.42 | 0.049  | *   |      |       | 0.050  |     |     |       |
| PC aa C26:0                                      |      |       | 0.122  |     |      |       | 0.186  |     |     |       |
| <b>PC aa C28:1</b>                               | 0.50 | 12.56 | 0.047  | *   |      |       | 0.165  |     |     |       |
| <b>PC aa C30:0</b>                               | 0.42 | 02.41 | 0.023  | *   | 0.86 | 00.17 | <0.001 | *** | 104 | 2.24  |
| <b>PC aa C32:0</b>                               |      |       | 0.086  |     | 0.50 | 20.28 | 0.007  | **  |     |       |
| <b>PC aa C32:1</b>                               |      |       | 0.300  |     | 0.23 | 22.97 | 0.046  | *   |     |       |
| <b>PC aa C32:3</b>                               |      |       | 0.612  |     |      |       | 0.122  |     |     |       |
| PC aa C34:1                                      |      |       | 0.570  |     |      |       | 0.065  |     |     |       |
| PC aa C34:2                                      |      |       | 0.689  |     | 0.37 | 18.21 | 0.045  | *   |     |       |
| PC aa C34:3                                      |      |       | 0.832  |     | 0.60 | 21.69 | <0.001 | *** |     |       |
| <b>PC aa C34:4</b>                               |      |       | 0.208  |     |      |       | 0.306  |     |     |       |
| PC aa C36:0                                      |      |       | 0.259  |     | 0.52 | 10.07 | 0.009  | **  |     |       |
| PC aa C36:1                                      |      |       | 0.052  |     |      |       | 0.109  |     |     |       |
| PC aa C36:2                                      |      |       | 0.725  |     | 0.37 | 17.99 | 0.044  | *   |     |       |
| PC aa C36:3                                      |      |       | 0.055  |     | 0.43 | 18.76 | 0.030  | *   |     |       |
| PC aa C36:4                                      | 0.51 | 16.49 | 0.011  | *   | 0.45 | 18.10 | 0.019  | *   | -13 | -1.61 |
| PC aa C36:5                                      |      |       | 0.056  |     | 0.43 | 18.95 | 0.011  | *   |     |       |

|                    |      |       |        |     |      |       |       |     |     |       |  |
|--------------------|------|-------|--------|-----|------|-------|-------|-----|-----|-------|--|
| <b>PC aa C36:6</b> |      |       | 0.071  |     |      |       | 0.060 |     |     |       |  |
| PC aa C38:0        | 0.84 | 14.15 | <0.001 | *** | 0.55 | 14.55 | 0.007 | **  | -34 | -0.40 |  |
| PC aa C38:3        | 0.75 | 14.66 | 0.001  | *** | 0.58 | 16.19 | 0.003 | **  | -23 | -1.53 |  |
| PC aa C38:4        | 0.82 | 15.36 | <0.001 | *** | 0.60 | 16.44 | 0.005 | **  | -27 | -1.08 |  |
| PC aa C38:5        | 0.74 | 14.94 | 0.001  | **  | 0.55 | 16.57 | 0.006 | **  | -26 | -1.63 |  |
| PC aa C38:6        | 0.77 | 15.02 | 0.001  | *** | 0.67 | 16.54 | 0.002 | **  | -12 | -1.52 |  |
| PC aa C40:1        | 0.70 | 13.48 | <0.001 | *** | 0.59 | 15.61 | 0.012 | *   | -16 | -2.13 |  |
| PC aa C40:2        | 0.66 | 13.84 | 0.001  | *** | 0.54 | 15.60 | 0.021 | *   | -18 | -1.76 |  |
| PC aa C40:3        | 0.77 | 14.22 | <0.001 | *** | 0.52 | 15.77 | 0.009 | **  | -33 | -1.55 |  |
| PC aa C40:4        | 0.85 | 14.57 | <0.001 | *** | 0.59 | 15.32 | 0.003 | **  | -31 | -0.75 |  |
| PC aa C40:5        | 0.85 | 14.70 | <0.001 | *** | 0.66 | 15.61 | 0.001 | *** | -23 | -0.91 |  |
| PC aa C40:6        | 0.84 | 14.72 | <0.001 | *** | 0.66 | 16.24 | 0.002 | **  | -20 | -1.52 |  |
| PC aa C42:0        | 0.79 | 13.96 | <0.001 | *** | 0.51 | 14.55 | 0.009 | **  | -36 | -0.59 |  |
| PC aa C42:1        | 0.73 | 14.07 | 0.001  | *** | 0.54 | 15.32 | 0.021 | *   | -27 | -1.24 |  |
| PC aa C42:2        | 0.68 | 13.82 | <0.001 | *** | 0.55 | 15.83 | 0.015 | *   | -19 | -2.01 |  |
| PC aa C42:4        | 0.79 | 14.32 | <0.001 | *** | 0.55 | 15.16 | 0.018 | *   | -31 | -0.83 |  |
| PC aa C42:5        | 0.87 | 14.34 | <0.001 | *** | 0.60 | 15.42 | 0.007 | **  | -31 | -1.08 |  |
| PC aa C42:6        | 0.76 | 14.20 | 0.002  | **  | 0.45 | 15.36 | 0.036 | *   | -40 | -1.17 |  |
| <b>PC ae C30:0</b> |      |       | 0.195  |     |      |       | 0.078 |     |     |       |  |
| PC ae C30:1        |      |       | 0.440  |     |      |       | 0.756 |     |     |       |  |
| PC ae C30:2        | 0.51 | 11.55 | 0.021  | *   |      |       | 0.331 |     |     |       |  |
| <b>PC ae C32:1</b> | 0.67 | 13.19 | 0.002  | **  |      |       | 0.075 |     |     |       |  |
| PC ae C32:2        | 0.71 | 13.34 | 0.003  | **  | 0.45 | 15.53 | 0.028 | *   | -36 | -2.19 |  |
| <b>PC ae C34:0</b> |      |       | 0.403  |     |      |       | 0.160 |     |     |       |  |
| <b>PC ae C34:1</b> |      |       | 0.050  |     |      |       | 0.241 |     |     |       |  |
| PC ae C34:2        | 0.51 | 14.43 | 0.012  | *   | 0.33 | 17.91 | 0.047 | *   | -36 | -3.47 |  |
| PC ae C34:3        | 0.98 | 15.07 | <0.001 | *** | 0.53 | 14.85 | 0.002 | **  | -46 | 0.22  |  |
| <b>PC ae C36:0</b> | 0.56 | 13.09 | 0.011  | *   |      |       | 0.163 |     |     |       |  |
| <b>PC ae C36:1</b> |      |       | 0.099  |     |      |       | 0.140 |     |     |       |  |
| <b>PC ae C36:2</b> |      |       | 0.392  |     | 0.33 | 19.37 | 0.033 | *   |     |       |  |
| PC ae C36:3        | 0.67 | 14.27 | 0.001  | **  | 0.39 | 16.19 | 0.026 | *   | -42 | -1.92 |  |
| PC ae C36:4        | 0.89 | 14.33 | <0.001 | *** | 0.53 | 14.33 | 0.005 | **  | -40 | -0.01 |  |
| PC ae C36:5        | 0.94 | 14.37 | <0.001 | *** | 0.55 | 13.60 | 0.005 | **  | -42 | 0.76  |  |
| PC ae C38:0        | 0.55 | 14.98 | 0.014  | *   | 0.52 | 18.27 | 0.002 | **  | -5  | -3.28 |  |
| <b>PC ae C38:2</b> |      |       | 0.918  |     | 0.54 | 20.55 | 0.003 | **  |     |       |  |
| <b>PC ae C38:3</b> | 0.49 | 12.72 | 0.045  | *   | 0.36 | 15.54 | 0.027 | *   | -27 | -2.82 |  |
| <b>PC ae C38:4</b> | 0.69 | 13.71 | 0.003  | **  | 0.48 | 14.77 | 0.009 | **  | -31 | -1.06 |  |
| PC ae C38:5        | 0.85 | 14.22 | <0.001 | *** | 0.56 | 14.52 | 0.004 | **  | -34 | -0.30 |  |
| PC ae C38:6        | 0.85 | 14.14 | <0.001 | *** | 0.52 | 14.62 | 0.004 | **  | -39 | -0.48 |  |
| PC ae C40:1        | 0.41 | 14.56 | 0.049  | *   | 0.45 | 20.44 | 0.041 | *   | 10  | -5.87 |  |



|                      |      |       |        |     |      |       |       |    |     |       |
|----------------------|------|-------|--------|-----|------|-------|-------|----|-----|-------|
| <b>PC ae C40:2</b>   | 0.54 | 13.07 | 0.018  | *   |      |       | 0.067 |    |     |       |
| <b>PC ae C40:3</b>   | 0.64 | 13.38 | 0.009  | **  | 0.45 | 14.86 | 0.015 | *  | -31 | -1.48 |
| PC ae C40:4          | 0.75 | 13.96 | 0.001  | *** | 0.51 | 15.12 | 0.008 | ** | -32 | -1.16 |
| <b>PC ae C40:5</b>   | 0.76 | 13.91 | <0.001 | *** | 0.52 | 14.80 | 0.006 | ** | -32 | -0.88 |
| <b>PC ae C40:6</b>   | 0.71 | 13.48 | 0.002  | **  | 0.56 | 14.83 | 0.002 | ** | -21 | -1.35 |
| PC ae C42:0          | 0.75 | 14.49 | 0.001  | *** | 0.65 | 16.08 | 0.006 | ** | -14 | -1.59 |
| PC ae C42:1          | 0.58 | 13.54 | 0.005  | **  |      |       | 0.156 |    |     |       |
| PC ae C42:2          | 0.59 | 13.73 | 0.009  | **  |      |       | 0.211 |    |     |       |
| PC ae C42:3          | 0.57 | 13.56 | 0.009  | **  |      |       | 0.204 |    |     |       |
| PC ae C42:4          | 0.78 | 14.28 | 0.000  | *** | 0.50 | 15.46 | 0.010 | *  | -36 | -1.18 |
| PC ae C42:5          | 0.81 | 14.11 | 0.000  | *** | 0.56 | 14.59 | 0.004 | ** | -31 | -0.48 |
| PC ae C44:3          | 0.59 | 12.45 | 0.003  | **  |      |       | 0.160 |    |     |       |
| PC ae C44:4          | 0.70 | 14.11 | <0.001 | *** | 0.58 | 15.29 | 0.004 | ** | -18 | -1.18 |
| PC ae C44:5          | 0.80 | 14.29 | <0.001 | *** | 0.56 | 14.55 | 0.004 | ** | -30 | -0.26 |
| PC ae C44:6          | 0.83 | 14.27 | <0.001 | *** | 0.58 | 14.32 | 0.005 | ** | -31 | -0.05 |
| <i>Sphingolipids</i> |      |       |        |     |      |       |       |    |     |       |
| <b>SM (OH) C14:1</b> | 0.58 | 12.61 | 0.011  | *   |      |       | 0.056 |    |     |       |
| SM C16:0             | 0.68 | 13.58 | 0.001  | **  | 0.47 | 13.70 | 0.012 | *  | -30 | -0.12 |
| SM C16:1             | 0.72 | 13.48 | 0.001  | *** | 0.51 | 13.73 | 0.007 | ** | -28 | -0.25 |
| <b>SM (OH) C16:1</b> | 0.58 | 12.58 | 0.013  | *   | 0.39 | 12.26 | 0.015 | *  | -32 | 0.32  |
| SM C18:0             | 0.63 | 13.51 | 0.003  | **  | 0.44 | 13.69 | 0.007 | ** | -30 | -0.18 |
| SM C18:1             | 0.67 | 13.34 | 0.003  | **  | 0.51 | 13.24 | 0.003 | ** | -24 | 0.10  |
| <b>SM C20:2</b>      | 0.49 | 12.57 | 0.012  | *   | 0.35 | 14.54 | 0.021 | *  | -30 | -1.97 |
| SM (OH) C22:1        | 0.55 | 12.77 | 0.011  | *   | 0.40 | 12.44 | 0.022 | *  | -27 | 0.33  |
| <b>SM (OH) C22:2</b> | 0.64 | 13.30 | 0.003  | **  | 0.46 | 12.50 | 0.010 | ** | -27 | 0.81  |
| SM C24:0             | 0.57 | 13.47 | 0.005  | **  | 0.42 | 13.45 | 0.015 | *  | -27 | 0.02  |
| SM C24:1             | 0.66 | 13.86 | 0.001  | **  | 0.52 | 13.59 | 0.007 | ** | -21 | 0.27  |
| SM (OH) C24:1        | 0.56 | 12.19 | 0.002  | **  | 0.42 | 12.06 | 0.014 | *  | -25 | 0.14  |
| SM C26:0             | 0.57 | 13.18 | 0.009  | **  | 0.44 | 12.84 | 0.012 | *  | -22 | 0.34  |
| SM C26:1             | 0.54 | 13.34 | 0.002  | **  | 0.46 | 13.12 | 0.014 | *  | -15 | 0.23  |

\*  $p < 0.05$ ; \*\*  $p < 0.01$ ; \*\*\*  $p < 0.001$  cosine fit;  $p > 0.05$ , amplitude and acrophase cannot be calculated. Metabolites in bold ( $n = 41$ ) were significantly increased during sleep deprivation compared with during the sleep period ( $p < 0.05$ ,  $q < 0.05$ ). Acrophase phase shift ( $\Delta\phi$ ) (dec.h), positive values indicate a phase advance and negative values indicate a phase delay on day 2 compared to day 1.

Table S7: Targeted metabolic profiling data: mean ( $\pm$  SEM), minimum and maximum concentrations [ $\mu$ M] of 171 metabolites.

| Metabolite                                | Day 1                    |                |                | Day 2                    |                |                |
|-------------------------------------------|--------------------------|----------------|----------------|--------------------------|----------------|----------------|
|                                           | Concentration [ $\mu$ M] |                |                | Concentration [ $\mu$ M] |                |                |
|                                           | mean $\pm$ SEM           | minimum (mean) | maximum (mean) | mean $\pm$ SEM           | minimum (mean) | maximum (mean) |
| <i>Amino acids</i>                        |                          |                |                |                          |                |                |
| Alanine                                   | 394.78 $\pm$ 12.71       | 182.75         | 579.87         | 393.17 $\pm$ 13.42       | 249.76         | 675.88         |
| Arginine                                  | 103.08 $\pm$ 2.92        | 47.52          | 163.87         | 104.42 $\pm$ 3.94        | 52.74          | 176.60         |
| Asparagine                                | 56.91 $\pm$ 2.08         | 29.97          | 93.51          | 59.39 $\pm$ 2.57         | 32.33          | 109.71         |
| Aspartate                                 | 6.35 $\pm$ 0.35          | 0.60           | 33.47          | 6.49 $\pm$ 0.27          | 0.10           | 33.47          |
| Citrulline                                | 35.91 $\pm$ 0.68         | 11.80          | 59.36          | 35.20 $\pm$ 0.65         | 18.52          | 54.87          |
| Glutamate                                 | 48.78 $\pm$ 4.25         | 10.48          | 162.93         | 48.98 $\pm$ 3.92         | 8.68           | 128.98         |
| Glutamine                                 | 758.43 $\pm$ 11.42       | 358.32         | 1043.57        | 742.45 $\pm$ 14.32       | 478.55         | 1292.59        |
| Glycine                                   | 260.26 $\pm$ 3.92        | 121.15         | 394.80         | 255.61 $\pm$ 4.77        | 140.05         | 410.25         |
| Histidine                                 | 109.54 $\pm$ 1.89        | 46.82          | 159.02         | 109.84 $\pm$ 2.55        | 72.44          | 155.48         |
| Isoleucine                                | 98.36 $\pm$ 6.29         | 39.95          | 172.22         | 102.92 $\pm$ 7.66        | 42.39          | 190.31         |
| Leucine                                   | 182.04 $\pm$ 9.58        | 90.02          | 352.90         | 185.90 $\pm$ 11.74       | 81.29          | 358.40         |
| Lysine                                    | 271.09 $\pm$ 9.05        | 139.04         | 494.51         | 280.22 $\pm$ 11.61       | 145.36         | 575.72         |
| Methionine                                | 32.42 $\pm$ 1.54         | 18.41          | 58.29          | 34.32 $\pm$ 1.78         | 17.73          | 65.47          |
| Ornithine                                 | 69.64 $\pm$ 1.73         | 33.80          | 118.11         | 69.27 $\pm$ 2.50         | 32.35          | 118.41         |
| Phenylalanine                             | 79.61 $\pm$ 3.12         | 48.55          | 148.88         | 80.40 $\pm$ 3.22         | 36.24          | 143.56         |
| Proline                                   | 351.68 $\pm$ 13.5        | 170.66         | 545.80         | 363.62 $\pm$ 16.94       | 175.31         | 606.51         |
| Serine                                    | 115.28 $\pm$ 3.31        | 62.41          | 193.55         | 118.73 $\pm$ 4.22        | 56.91          | 210.25         |
| Threonine                                 | 135.36 $\pm$ 3.35        | 81.03          | 226.05         | 139.17 $\pm$ 4.57        | 75.83          | 275.12         |
| <b>Tryptophan</b>                         | 72.24 $\pm$ 2.07         | 35.60          | 121.67         | 77.63 $\pm$ 2.29         | 35.60          | 139.35         |
| Tyrosine                                  | 78.37 $\pm$ 2.99         | 44.07          | 133.01         | 80.89 $\pm$ 3.74         | 35.11          | 152.37         |
| Valine                                    | 311.93 $\pm$ 10.00       | 185.73         | 470.47         | 318.70 $\pm$ 12.89       | 159.35         | 492.78         |
| <i>Biogenic amines</i>                    |                          |                |                |                          |                |                |
| Alpha-Aminoadipic acid (alpha-AAA)        | 0.95 $\pm$ 0.04          | 0.15           | 2.26           | 0.99 $\pm$ 0.05          | 0.05           | 2.34           |
| Asymmetric dimethylarginine (ADMA)        | 0.55 $\pm$ 0.02          | 0.04           | 0.99           | 0.56 $\pm$ 0.02          | 0.04           | 1.11           |
| Symmetrical Dimethylarginine (SDMA)       | 0.47 $\pm$ 0.01          | 0.19           | 0.71           | 0.48 $\pm$ 0.01          | 0.13           | 0.71           |
| Total Dimethylarginine (DMA)              | 0.79 $\pm$ 0.01          | 0.18           | 1.32           | 0.79 $\pm$ 0.01          | 0.13           | 1.47           |
| Creatinine                                | 125.73 $\pm$ 4.25        | 27.05          | 303.90         | 133.97 $\pm$ 4.25        | 24.07          | 317.12         |
| Kynurenine                                | 3.73 $\pm$ 0.08          | 1.43           | 9.46           | 3.73 $\pm$ 0.08          | 1.51           | 9.07           |
| Sarcosine                                 | 1.67 $\pm$ 0.06          | 0.67           | 3.01           | 1.71 $\pm$ 0.07          | 0.67           | 2.73           |
| <b>Serotonin</b>                          | 0.19 $\pm$ 0.01          | 0.04           | 0.74           | 0.20 $\pm$ 0.01          | 0.04           | 0.76           |
| <b>Taurine</b>                            | 49.39 $\pm$ 1.32         | 19.19          | 96.27          | 51.12 $\pm$ 0.56         | 26.47          | 92.54          |
| <i>Hexoses</i>                            |                          |                |                |                          |                |                |
| Hexose                                    | 8530.88 $\pm$ 221.63     | 3616.90        | 17177.82       | 9101.27 $\pm$ 227.29     | 3634.58        | 21141.69       |
| <i>Acylcarnitines</i>                     |                          |                |                |                          |                |                |
| Carnitine (C0)                            | 37.04 $\pm$ 0.57         | 17.56          | 56.29          | 37.63 $\pm$ 0.50         | 21.26          | 58.23          |
| Acetylcarnitine (C2)                      | 3.66 $\pm$ 0.16          | 1.22           | 7.28           | 3.64 $\pm$ 0.15          | 1.46           | 7.85           |
| <b>Propionylcarnitine (C3)</b>            | 0.34 $\pm$ 0.01          | 0.18           | 0.62           | 0.36 $\pm$ 0.02          | 0.18           | 0.68           |
| Propenoylcarnitine (C3:1)                 | 0.05 $\pm$ <0.01         | 0.02           | 0.11           | 0.04 $\pm$ <0.01         | 0.02           | 0.10           |
| Hydroxybutyrylcarnitine (C3-DC (C4-OH))   | 0.01 $\pm$ <0.01         | <0.01          | 0.01           | 0.01 $\pm$ <0.01         | <0.01          | 0.02           |
| Hydroxypropionylcarnitine (C3-OH)         | 0.01 $\pm$ <0.01         | <0.01          | 0.01           | 0.01 $\pm$ <0.01         | <0.01          | 0.01           |
| Butyrylcarnitine (C4)                     | 0.19 $\pm$ 0.01          | 0.10           | 0.34           | 0.19 $\pm$ 0.01          | 0.09           | 0.34           |
| Butenylcarnitine (C4:1)                   | 0.005 $\pm$ <0.01        | <0.01          | 0.01           | 0.01 $\pm$ <0.01         | <0.01          | 0.05           |
| <b>Valerylcarnitine (C5)</b>              | 0.14 $\pm$ <0.01         | 0.06           | 0.33           | 0.14 $\pm$ 0.01          | 0.07           | 0.35           |
| Tiglylcarnitine (C5:1)                    | 0.01 $\pm$ <0.01         | 0.01           | 0.02           | 0.01 $\pm$ <0.01         | 0.01           | 0.02           |
| Glutaconylcarnitine (C5:1-DC)             | 0.03 $\pm$ <0.01         | 0.02           | 0.07           | 0.03 $\pm$ <0.01         | 0.02           | 0.06           |
| Hydroxyhexanoylcarnitine (C5-DC (C6-OH))  | 0.03 $\pm$ <0.01         | 0.02           | 0.07           | 0.03 $\pm$ <0.01         | 0.02           | 0.05           |
| Methylglutaryl carnitine (C5-M-DC)        | 0.01 $\pm$ <0.01         | 0.01           | 0.02           | 0.01 $\pm$ <0.01         | 0.01           | 0.02           |
| Hydroxyvalerylcarnitine (C5-OH (C3-DC-M)) | 0.01 $\pm$ <0.01         | <0.01          | 0.02           | 0.01 $\pm$ <0.01         | <0.01          | 0.02           |

|                                                  |               |        |        |               |        |        |
|--------------------------------------------------|---------------|--------|--------|---------------|--------|--------|
| Hexanoylcarnitine (C6 (C4:1-DC))                 | 0.05 ± <0.01  | 0.02   | 0.09   | 0.05 ± <0.01  | 0.03   | 0.07   |
| Hexenoylcarnitine (C6:1)                         | 0.01 ± <0.01  | <0.01  | 0.02   | 0.01 ± <0.01  | 0.00   | 0.02   |
| <b>Pimelylcarnitine (C7-DC )</b>                 | 0.01 ± <0.01  | <0.01  | 0.06   | 0.01 ± <0.01  | <0.01  | 0.05   |
| <b>Octanoylcarnitine (C8)</b>                    | 0.08 ± <0.01  | 0.03   | 0.20   | 0.08 ± <0.01  | 0.05   | 0.17   |
| <b>Nonaylcarnitine (C9)</b>                      | 0.03 ± <0.01  | 0.01   | 0.08   | 0.04 ± <0.01  | 0.01   | 0.07   |
| <b>Decanoylcarnitine (C10 )</b>                  | 0.12 ± 0.01   | 0.04   | 0.42   | 0.12 ± 0.01   | 0.04   | 0.31   |
| Decenoylcarnitine (C10:1)                        | 0.13 ± <0.01  | 0.06   | 0.25   | 0.12 ± <0.01  | 0.05   | 0.25   |
| Decadienylcarnitine (C10:2)                      | 0.03 ± <0.01  | 0.02   | 0.06   | 0.03 ± <0.01  | 0.01   | 0.06   |
| <b>Dodecanoylcarnitine (C12)</b>                 | 0.06 ± <0.01  | 0.03   | 0.18   | 0.06 ± <0.01  | 0.03   | 0.18   |
| Dodecenoylcarnitine (C12:1)                      | 0.04 ± <0.01  | 0.03   | 0.05   | 0.04 ± <0.01  | 0.03   | 0.04   |
| Dodecanedioylcarnitine (C12-DC)                  | 0.09 ± <0.01  | 0.03   | 0.19   | 0.09 ± <0.01  | 0.03   | 0.19   |
| <b>Tetradecanoylcarnitine (C14)</b>              | 0.03 ± <0.01  | 0.02   | 0.05   | 0.03 ± <0.01  | 0.02   | 0.05   |
| Tetradecenoylcarnitine (C14:1)                   | 0.05 ± <0.01  | 0.02   | 0.13   | 0.05 ± <0.01  | 0.01   | 0.13   |
| Hydroxytetradecenoylcarnitine C14:1-OH           | 0.01 ± <0.01  | <0.01  | 0.02   | 0.01 ± <0.01  | <0.01  | 0.02   |
| Tetradecadienylcarnitine (C14:2)                 | 0.01 ± <0.01  | <0.01  | 0.06   | 0.01 ± <0.01  | <0.01  | 0.06   |
| Hydroxytetradecadienylcarnitine (C14:2-OH)       | 0.01 ± <0.01  | <0.01  | 0.01   | 0.01 ± <0.01  | <0.01  | 0.01   |
| Hexadecanoylcarnitine (C16)                      | 0.08 ± <0.01  | 0.03   | 0.16   | 0.08 ± <0.01  | 0.04   | 0.14   |
| Hexadecenoylcarnitine (C16:1)                    | 0.004 ± <0.01 | <0.01  | 0.01   | 0.004 ± <0.01 | <0.01  | 0.01   |
| Hydroxyhexadecenoylcarnitine (C16:1-OH)          | 0.01 ± <0.01  | 0.01   | 0.04   | 0.01 ± <0.01  | 0.01   | 0.04   |
| Hexadecadienylcarnitine (C16:2)                  | 0.01 ± <0.01  | <0.01  | 0.01   | 0.01 ± <0.01  | <0.01  | 0.01   |
| <b>Hydroxyhexadecadienylcarnitine (C16:2-OH)</b> | 0.004 ± <0.01 | <0.01  | 0.02   | 0.004 ± <0.01 | <0.01  | 0.01   |
| Hydroxyhexadecanoylcarnitine (C16-OH)            | 0.01 ± <0.01  | <0.01  | 0.01   | 0.01 ± <0.01  | <0.01  | 0.01   |
| Octadecanoylcarnitine (C18)                      | 0.03 ± <0.01  | 0.01   | 0.09   | 0.04 ± <0.01  | 0.02   | 0.05   |
| Octadecenoylcarnitine (C18:1)                    | 0.07 ± <0.01  | 0.03   | 0.14   | 0.07 ± <0.01  | 0.03   | 0.14   |
| Hydroxyoctadecenoylcarnitine (C18:1-OH)          | 0.003 ± <0.01 | <0.01  | 0.01   | 0.004 ± <0.01 | <0.01  | 0.01   |
| Octadecadienylcarnitine (C18:2)                  | 0.02 ± <0.01  | 0.01   | 0.04   | 0.02 ± <0.01  | 0.01   | 0.04   |
| <i>Glycerophospholipids</i>                      |               |        |        |               |        |        |
| <b>lysoPC a C14:0</b>                            | 3.26 ± 0.03   | 2.05   | 4.25   | 3.49 ± 0.05   | 2.16   | 4.81   |
| lysoPC a C16:0                                   | 78.73 ± 2.19  | 30.54  | 141.32 | 78.79 ± 2.00  | 24.85  | 141.90 |
| <b>lysoPC a C16:1</b>                            | 2.71 ± 0.06   | 1.07   | 6.04   | 2.92 ± 0.05   | 1.04   | 5.65   |
| <b>lysoPC a C17:0</b>                            | 1.65 ± 0.05   | 0.63   | 2.84   | 1.86 ± 0.04   | 0.53   | 2.93   |
| lysoPC a C18:0                                   | 21.29 ± 0.58  | 7.18   | 40.93  | 20.81 ± 0.53  | 7.18   | 33.37  |
| <b>lysoPC a C18:1</b>                            | 20.72 ± 0.41  | 8.10   | 38.69  | 21.40 ± 0.38  | 6.58   | 36.43  |
| lysoPC a C18:2                                   | 36.90 ± 1.07  | 16.03  | 62.47  | 37.95 ± 1.15  | 10.27  | 63.74  |
| lysoPC a C20:3                                   | 2.83 ± 0.07   | 1.14   | 5.69   | 2.96 ± 0.07   | 1.08   | 4.80   |
| lysoPC a C20:4                                   | 6.52 ± 0.15   | 2.97   | 13.17  | 6.48 ± 0.13   | 2.56   | 10.39  |
| lysoPC a C24:0                                   | 0.26 ± 0.01   | 0.11   | 0.54   | 0.26 ± 0.01   | 0.11   | 0.52   |
| lysoPC a C26:0                                   | 0.53 ± 0.03   | 0.17   | 1.70   | 0.57 ± 0.02   | 0.19   | 1.70   |
| lysoPC a C26:1                                   | 0.24 ± 0.01   | 0.08   | 0.63   | 0.25 ± 0.01   | 0.10   | 0.60   |
| lysoPC a C28:0                                   | 0.47 ± 0.02   | 0.21   | 1.10   | 0.52 ± 0.01   | 0.21   | 1.11   |
| lysoPC a C28:1                                   | 0.50 ± 0.02   | 0.23   | 1.01   | 0.53 ± 0.01   | 0.24   | 1.01   |
| PC aa C24:0                                      | 0.22 ± 0.01   | 0.08   | 0.49   | 0.22 ± 0.01   | 0.08   | 0.49   |
| PC aa C26:0                                      | 1.40 ± 0.03   | 0.64   | 2.90   | 1.43 ± 0.04   | 0.65   | 2.66   |
| <b>PC aa C28:1</b>                               | 2.18 ± 0.05   | 1.15   | 3.21   | 2.33 ± 0.04   | 1.30   | 3.75   |
| <b>PC aa C30:0</b>                               | 4.09 ± 0.11   | 1.81   | 7.41   | 4.81 ± 0.17   | 1.75   | 7.79   |
| <b>PC aa C32:0</b>                               | 13.84 ± 0.27  | 5.92   | 19.39  | 14.69 ± 0.27  | 7.06   | 22.70  |
| <b>PC aa C32:1</b>                               | 16.29 ± 0.40  | 5.85   | 44.88  | 17.98 ± 0.28  | 7.58   | 36.08  |
| <b>PC aa C32:3</b>                               | 0.44 ± 0.01   | 0.22   | 0.71   | 0.46 ± 0.01   | 0.24   | 0.69   |
| PC aa C34:1                                      | 192.03 ± 2.09 | 111.04 | 292.41 | 198.25 ± 2.73 | 116.45 | 326.02 |
| PC aa C34:2                                      | 202.13 ± 3.88 | 132.96 | 499.08 | 213.95 ± 4.24 | 121.62 | 538.85 |
| PC aa C34:3                                      | 16.57 ± 0.29  | 7.31   | 30.07  | 17.52 ± 0.36  | 8.20   | 29.04  |
| <b>PC aa C34:4</b>                               | 1.90 ± 0.04   | 0.80   | 2.95   | 2.08 ± 0.03   | 0.89   | 3.35   |
| PC aa C36:0                                      | 2.03 ± 0.04   | 0.14   | 4.92   | 2.18 ± 0.05   | 0.55   | 4.99   |
| PC aa C36:1                                      | 63.84 ± 1.45  | 18.00  | 124.93 | 65.86 ± 1.42  | 33.69  | 115.83 |
| PC aa C36:2                                      | 174.97 ± 2.36 | 95.40  | 314.82 | 181.13 ± 2.79 | 113.33 | 345.74 |
| PC aa C36:3                                      | 135.03 ± 2.43 | 53.26  | 191.12 | 137.97 ± 2.46 | 62.21  | 196.89 |
| PC aa C36:4                                      | 178.33 ± 2.69 | 94.95  | 250.61 | 179.70 ± 2.77 | 86.25  | 269.66 |
| PC aa C36:5                                      | 19.97 ± 0.45  | 9.80   | 34.44  | 21.02 ± 0.41  | 9.10   | 35.35  |
| <b>PC aa C36:6</b>                               | 0.70 ± 0.02   | 0.27   | 1.15   | 0.75 ± 0.01   | 0.33   | 1.20   |
| PC aa C38:0                                      | 2.28 ± 0.06   | 0.85   | 3.31   | 2.24 ± 0.05   | 1.02   | 3.18   |

|                      |               |       |        |               |        |        |
|----------------------|---------------|-------|--------|---------------|--------|--------|
| PC aa C38:3          | 49.89 ± 1.28  | 17.46 | 94.57  | 49.96 ± 1.24  | 20.01  | 78.81  |
| PC aa C38:4          | 98.26 ± 2.47  | 41.20 | 171.18 | 95.63 ± 2.31  | 42.20  | 156.09 |
| PC aa C38:5          | 50.54 ± 1.27  | 23.78 | 87.16  | 50.83 ± 1.16  | 22.41  | 86.37  |
| PC aa C38:6          | 58.42 ± 1.49  | 23.99 | 94.56  | 57.99 ± 1.46  | 26.49  | 96.79  |
| PC aa C40:1          | 0.32 ± 0.01   | 0.16  | 0.47   | 0.32 ± 0.01   | 0.16   | 0.47   |
| PC aa C40:2          | 0.26 ± 0.01   | 0.07  | 0.47   | 0.25 ± 0.01   | 0.08   | 0.46   |
| PC aa C40:3          | 0.52 ± 0.01   | 0.21  | 0.90   | 0.52 ± 0.01   | 0.24   | 0.83   |
| PC aa C40:4          | 3.66 ± 0.10   | 1.50  | 7.49   | 3.67 ± 0.09   | 1.74   | 6.20   |
| PC aa C40:5          | 9.93 ± 0.28   | 3.85  | 21.02  | 9.73 ± 0.26   | 4.13   | 17.22  |
| PC aa C40:6          | 20.64 ± 0.55  | 7.67  | 34.95  | 20.11 ± 0.52  | 9.10   | 29.99  |
| PC aa C42:0          | 0.50 ± 0.01   | 0.20  | 0.77   | 0.49 ± 0.01   | 0.19   | 0.75   |
| PC aa C42:1          | 0.25 ± 0.01   | 0.10  | 0.37   | 0.25 ± 0.01   | 0.11   | 0.39   |
| PC aa C42:2          | 0.22 ± 0.01   | 0.11  | 0.33   | 0.22 ± 0.01   | 0.11   | 0.35   |
| PC aa C42:4          | 0.21 ± 0.01   | 0.09  | 0.35   | 0.20 ± 0.01   | 0.09   | 0.35   |
| PC aa C42:5          | 0.32 ± 0.01   | 0.12  | 0.59   | 0.31 ± 0.01   | 0.15   | 0.53   |
| PC aa C42:6          | 0.55 ± 0.01   | 0.25  | 1.03   | 0.54 ± 0.01   | 0.27   | 0.88   |
| <b>PC ae C30:0</b>   | 0.49 ± 0.01   | 0.24  | 0.76   | 0.59 ± 0.01   | 0.27   | 0.89   |
| PC ae C30:1          | 0.09 ± <0.01  | <0.01 | 0.39   | 0.10 ± 0.01   | <0.01  | 0.33   |
| PC ae C30:2          | 0.11 ± <0.01  | 0.06  | 0.20   | 0.12 ± <0.01  | 0.06   | 0.20   |
| <b>PC ae C32:1</b>   | 2.27 ± 0.06   | 0.90  | 3.55   | 2.43 ± 0.05   | 1.16   | 3.75   |
| PC ae C32:2          | 0.59 ± 0.02   | 0.28  | 0.98   | 0.62 ± 0.01   | 0.32   | 0.99   |
| <b>PC ae C34:0</b>   | 1.97 ± 0.05   | 0.79  | 3.22   | 2.35 ± 0.03   | 0.93   | 3.63   |
| <b>PC ae C34:1</b>   | 11.11 ± 0.29  | 3.96  | 17.85  | 12.41 ± 0.18  | 6.41   | 18.21  |
| PC ae C34:2          | 11.07 ± 0.23  | 3.95  | 18.79  | 11.23 ± 0.18  | 4.95   | 15.93  |
| PC ae C34:3          | 6.38 ± 0.22   | 2.20  | 12.23  | 6.37 ± 0.15   | 2.66   | 9.73   |
| <b>PC ae C36:0</b>   | 0.95 ± 0.02   | 0.33  | 1.57   | 1.01 ± 0.01   | 0.54   | 1.53   |
| <b>PC ae C36:1</b>   | 15.10 ± 0.40  | 5.89  | 23.65  | 17.16 ± 0.23  | 8.27   | 24.23  |
| <b>PC ae C36:2</b>   | 16.91 ± 0.40  | 6.43  | 28.10  | 18.86 ± 0.29  | 7.85   | 28.73  |
| PC ae C36:3          | 7.22 ± 0.17   | 2.30  | 11.56  | 7.32 ± 0.14   | 3.62   | 10.63  |
| PC ae C36:4          | 15.27 ± 0.43  | 5.66  | 28.87  | 14.86 ± 0.34  | 7.15   | 23.03  |
| PC ae C36:5          | 9.68 ± 0.30   | 3.63  | 17.51  | 9.33 ± 0.23   | 4.01   | 15.58  |
| PC ae C38:0          | 1.70 ± 0.04   | 0.76  | 2.58   | 1.79 ± 0.03   | 0.84   | 2.73   |
| <b>PC ae C38:2</b>   | 1.27 ± 0.04   | <0.01 | 2.70   | 1.46 ± 0.05   | 0.06   | 3.11   |
| <b>PC ae C38:3</b>   | 6.47 ± 0.18   | 2.29  | 11.02  | 7.25 ± 0.12   | 3.50   | 11.62  |
| <b>PC ae C38:4</b>   | 11.86 ± 0.31  | 4.63  | 21.95  | 12.49 ± 0.25  | 5.68   | 21.04  |
| PC ae C38:5          | 14.60 ± 0.39  | 5.51  | 24.41  | 14.44 ± 0.32  | 7.17   | 21.68  |
| PC ae C38:6          | 5.55 ± 0.15   | 1.95  | 8.73   | 5.45 ± 0.12   | 2.67   | 8.08   |
| PC ae C40:1          | 1.14 ± 0.02   | 0.48  | 1.80   | 1.17 ± 0.02   | 0.52   | 2.08   |
| <b>PC ae C40:2</b>   | 1.85 ± 0.05   | 0.70  | 2.84   | 2.01 ± 0.03   | 0.80   | 2.96   |
| <b>PC ae C40:3</b>   | 1.49 ± 0.04   | 0.63  | 2.17   | 1.58 ± 0.03   | 0.79   | 2.15   |
| PC ae C40:4          | 2.17 ± 0.06   | 0.90  | 4.30   | 2.22 ± 0.04   | 0.99   | 3.85   |
| <b>PC ae C40:5</b>   | 3.66 ± 0.09   | 1.39  | 6.31   | 3.80 ± 0.07   | 1.76   | 6.03   |
| <b>PC ae C40:6</b>   | 3.58 ± 0.09   | 1.33  | 5.81   | 3.74 ± 0.08   | 1.64   | 5.65   |
| PC ae C42:0          | 0.60 ± 0.01   | 0.35  | 0.94   | 0.59 ± 0.01   | 0.37   | 0.81   |
| PC ae C42:1          | 0.42 ± 0.01   | 0.20  | 0.77   | 0.41 ± 0.01   | 0.18   | 0.67   |
| PC ae C42:2          | 0.58 ± 0.01   | 0.24  | 1.01   | 0.59 ± 0.01   | 0.26   | 0.93   |
| PC ae C42:3          | 0.79 ± 0.02   | 0.31  | 1.26   | 0.79 ± 0.01   | 0.36   | 1.11   |
| PC ae C42:4          | 0.79 ± 0.02   | 0.28  | 1.54   | 0.79 ± 0.02   | 0.29   | 1.31   |
| PC ae C42:5          | 1.87 ± 0.04   | 0.80  | 3.37   | 1.86 ± 0.03   | 0.87   | 2.95   |
| PC ae C44:3          | 0.16 ± <0.01  | 0.07  | 0.26   | 0.16 ± <0.01  | 0.08   | 0.28   |
| PC ae C44:4          | 0.38 ± 0.01   | 0.15  | 0.69   | 0.38 ± 0.01   | 0.17   | 0.68   |
| PC ae C44:5          | 1.66 ± 0.04   | 0.58  | 3.28   | 1.65 ± 0.03   | 0.62   | 2.79   |
| PC ae C44:6          | 0.96 ± 0.03   | 0.41  | 1.74   | 0.94 ± 0.02   | 0.35   | 1.55   |
| <i>Sphingolipids</i> |               |       |        |               |        |        |
| <b>SM (OH) C14:1</b> | 7.24 ± 0.16   | 3.68  | 10.92  | 7.68 ± 0.12   | 4.01   | 11.37  |
| SM C16:0             | 164.93 ± 3.65 | 60.57 | 269.55 | 168.18 ± 3.14 | 101.67 | 254.46 |
| SM C16:1             | 22.45 ± 0.52  | 9.02  | 41.84  | 22.66 ± 0.46  | 13.95  | 43.16  |
| <b>SM (OH) C16:1</b> | 4.77 ± 0.11   | 2.13  | 7.24   | 5.18 ± 0.08   | 2.63   | 7.27   |
| SM C18:0             | 38.32 ± 0.84  | 16.49 | 57.68  | 39.81 ± 0.69  | 22.72  | 57.95  |
| SM C18:1             | 16.37 ± 0.38  | 7.00  | 29.58  | 16.97 ± 0.33  | 9.02   | 30.58  |
| <b>SM C20:2</b>      | 0.61 ± 0.01   | 0.20  | 1.15   | 0.65 ± 0.01   | 0.22   | 1.15   |
| SM (OH) C22:1        | 40.14 ± 0.84  | 15.04 | 76.25  | 41.70 ± 0.70  | 21.80  | 69.74  |

|                      |               |       |        |               |        |        |
|----------------------|---------------|-------|--------|---------------|--------|--------|
| <b>SM (OH) C22:2</b> | 43.56 ± 1.00  | 19.92 | 74.55  | 45.42 ± 0.84  | 25.70  | 68.87  |
| SM C24:0             | 43.05 ± 0.89  | 13.15 | 86.96  | 43.33 ± 0.80  | 20.57  | 79.09  |
| SM C24:1             | 192.64 ± 4.12 | 62.24 | 331.10 | 194.20 ± 3.83 | 117.26 | 297.09 |
| SM (OH) C24:1        | 2.06 ± 0.04   | 0.66  | 3.59   | 2.15 ± 0.03   | 1.07   | 3.56   |
| SM C26:0             | 0.32 ± 0.01   | 0.10  | 0.53   | 0.32 ± 0.01   | 0.15   | 0.54   |
| SM C26:1             | 0.62 ± 0.01   | 0.19  | 1.01   | 0.64 ± 0.01   | 0.35   | 1.01   |

Metabolites in bold (n = 41) were significantly increased during sleep deprivation compared with during the sleep period ( $p < 0.05$ ,  $q < 0.05$ ).

Table S8: Correlations between metabolites common to untargeted and targeted analysis.

| Metabolite                       | Pearson r | R squared | P value  | P value summary |
|----------------------------------|-----------|-----------|----------|-----------------|
| Leucine                          | 0.345     | 0.119     | < 0.0001 | ****            |
| Methionine                       | 0.431     | 0.186     | < 0.0001 | ****            |
| Phenylalanine                    | 0.474     | 0.225     | < 0.0001 | ****            |
| Proline                          | 0.577     | 0.333     | < 0.0001 | ****            |
| Tryptophan                       | 0.513     | 0.263     | < 0.0001 | ****            |
| Tyrosine                         | 0.462     | 0.214     | < 0.0001 | ****            |
| Acetylcarnitine (C2)             | 0.596     | 0.355     | < 0.0001 | ****            |
| Propionylcarnitine (C3)          | 0.287     | 0.083     | < 0.0001 | ****            |
| Butyrylcarnitine (C4)            | 0.445     | 0.198     | < 0.0001 | ****            |
| Octanoylcarnitine (C8)           | 0.832     | 0.693     | < 0.0001 | ****            |
| Decanoylcarnitine (C10 )         | 0.875     | 0.766     | < 0.0001 | ****            |
| Dodecanoylcarnitine (C12)        | 0.806     | 0.650     | < 0.0001 | ****            |
| Tetradecanoylcarnitine (C14)     | 0.573     | 0.329     | < 0.0001 | ****            |
| Tetradecenoylcarnitine (C14:1)   | 0.517     | 0.267     | < 0.0001 | ****            |
| Tetradecadienylcarnitine (C14:2) | 0.764     | 0.583     | < 0.0001 | ****            |
| Hexadecanoylcarnitine (C16)      | 0.512     | 0.262     | < 0.0001 | ****            |
| Octadecanoylcarnitine (C18)      | 0.346     | 0.120     | < 0.0001 | ****            |
| Octadecenoylcarnitine (C18:1)    | 0.516     | 0.266     | < 0.0001 | ****            |
| LysoPC a C18:2                   | 0.540     | 0.292     | < 0.0001 | ****            |
| LysoPC a C20:3                   | 0.199     | 0.039     | 0.0005   | ***             |
